# Supplementary material for: Pseudosymmetric layers in high-Z′ and P1 structures of organic molecules
Source: Royal Society of Chemistry journal article supplement (doi:10.1039/d0ce00302f), 2020-01-01
Supplement: d0ce00302f2.xlsx [file d0ce00302f2.xlsx]

## Sheet: Alt Layrs
Z'	Type of Stack	Refcode	Spc Grp #	Layer hkl	# Layrs in Cell	# Sym Ind Layrs in Cell	Sym Relating Layers (other than trans)	# of Diff Layrs	Molecules in Layers	Stacking Pattern	Flat, Wavy or Corrugated?	Axes, approx Layer Group for Layer(s) A (std setting)	Axes, approx Layer Group for Layer(s) B (std setting)	Axes, approx Layer Group for Layer(s) C (std setting)	Exact Sectional Layer Groups of the Space Group?	Layer Sym > Xtal Sym	Layer Syms Differ	Strong inter-actions or Confs Differ	|in-plane angle - ideal value|, deg	Other Differ-ences	Strong interactions (eg, H Bonds) in Layers?	Trans-lational Mod Within Layer?	Comments
6	A	AGIXIZ	14	(1 0 0)	4	3	1-bar (relates B,B')	2	A1/ 2,2',2",2'" B/ 1,3,4,6, 1',3'.4',6' A2/ 5,5',5",5"'	A1,B,A2,B',A1,...	flat	b, c p2(1)/b11 (#17) (exact)	b, c p2/b11 (#16) (glides exact)		A1, A2 only	(yes)	yes	yes	(0 by sym)	molecular conforma-tions differ	0-D		Planar molecules form dimers through Br…O contacts (distance < sumVDW+0.2 Å). Layers at x=0, 1/2 are can be superposed by translation [0, 1/2, 1/2] and are related by the 2(1) axes of the space group. Layer B has axes 2 rather than 2(1) and is twice as thick. The molecular conformations in the two layers differ by a 180 deg rotation of a -C(=O)OMe group. The O atom in the dimers is different (an …	AGIXIZ
5	A	CIFGEE	1	(0 0 1)	2	2		2	A/ 1,3 B/ 2,4,5	A,B,A,B,…	corrugated	b, a p2(1)11 (#9)	a, b p1 (#1), z'=3			yes	yes	yes	0.2	composition; H-bond patterns	1-D		In layers A there are H-bonded chains along b with -OH…NC- interactions (even though there is a =O acceptor in the molecule). In layers B there are H-bonded columns along a in which three molecules are arranged to form H bonds to an included H2O; the H bonds in the B layers involve the –OH and =O groups.	CIFGEE
6	A	COJJER	4	(0 0 1)	4	3	2(1) (also relates 5,5' and B,B')	2	A1/ 6,6' B/ 1,2,3,4 A2/ 5,5'	A1,B,A2,B',A1,…	interdigi-tating	b, a p2(1)11 (#9) (exact)	b, a p2(1)2(1)2 (#21)		A1, A2 only	yes	yes		(0 by sym)			c/2	Molecules all basically the same but #2 and #4 are twisted a little differently. Twofold modulation along c generates additional approximatel 2(1) axes. Alternating, corrgated layers (0 0 1). Pairs of molecules #1,2 and #3,4 are related by rather approximate twofolds. Layers at z=0, 1/2 (#6,6' and #5,5') have exact symmetry p12(1)1 (#9) and no pseudosymmetry; layer at z ca 1/4 has approximate sym…	COJJER
12	A	GENLAN	2	(1 0 0)	2	2		2	A/ 1-8,1'-8' B/ 9-12,9'-12'	A,B,A,…	corrugated	b/2, c p1-bar (#2) (half of 1-bars exact)	b, c/2 p1-bar (#2) (half of 1-bars exact)			yes	yes		(NA)	very different molecular orientations		b/2 in A; c/2 in B	4-Ethynyl-N,N-dimethylaniline. Three sets of coplanar molecules: #1-4, 5-8, 9-12; the sets are roughly perpendicular. Layers (1 0 0); sets 1, 2 form a layer at x=0 with sym p1-bar (#2), z'=2 and approximate translation b/2; set 3 forms a bilayer at x=1/2 with symmetry p1-bar and an approximate translation c/2. Ethynyl...pi interactions (weak) between layers; the presence of two layers also solves…	GENLAN
6	A	HAXLAV	4	(0 0 1)	3	2	2(1) (relates A,A')	2	A/ 1,2,3,4 B/ 5,6,5',6'	A,B,A',A,…	flat	a, b p2(1)/b11 (#17)	a, b pbam (#44) [one set of 2(1)s exact]			yes	yes		(0 by sym)		1-D		Layers (0 0 1) at z=1/6, 5/6 (#1-4) have approx layer sym p2(1)/b11 (#17) and 85:15 disorder. Layer at z=1/2 (#5,6) has true p12(1)1 (#9) symmetry and approximate symmetry pbam (#44) if the 50:50 disorder is considered (pbam is p12(1)/a, a nonstandard setting of #17, pius a mirror within the layer). If the disorder in layer B comes from some kind of twnning rather than disorder within the layer t…	HAXLAV
6	A	IJUDIC	4	(0 1 0)	4	2	2(1)	2	A/ 3,6 B/ 4.5,1,2	A,B,A',B', A,…	flat	c, a p-1 (#2)	c/2, a p11a (#5)		B only	yes	yes		(NA)		1-D	c/2 in B only	Salt of diethylammonium and 1,3,2-dioxaphosphinane-2-thiolate 2-sulfide. Ions make H-bonded chains along a. There are two different layer types (0 1 0), one with approximate symmetry p-1 (#2) and the other with approx sym p11a and a twofold pseudotranslations. One of the 1-bar sites in A is at 0.000, -0.035, 0.375, so is well offset along c from the 2(1) axis at x=0, z=0.5.	IJUDIC
5	A	IYUWAB	5	(1 0 0)	4	2	C center-ing	2	A/ 3,4,5,3',4',5' B/ 1,2,1',2'	A,B,A',B,',A,B, …	flat	b, c p211 (#8) (exact), z'=3	b, c p2(1)11 (#9) (exact), z'=2		yes		yes		(0 by sym)		0-D in B		Molecules # 3,4,5 make a double layer around axes 2 at x=0, 1/2 (p12(1)1; std p2(1)11, #9); no N(H)...O= distances less than sum(VDW)+0.2 Å for molecules #3, #4. Molecules #1,2 make more compact double layers around 2(1) axes at x=1/4, 3/4 (p121; std p211, #8); there are H-bonded dimers although the #2...1 distance is somewhat long (3.11 Å or < SumVDW+0.1 Å). There one NH...O= bond, between #2 an…	IYUWAB
6	A	JUXJIX	14	(0 1 0)	4	2	2(1)	2	A/ 3,4,6,3',4',6' B/ 1,2,5,1',2',5'	A,B,A',B,', A,B, …	corrugated	a, c p1-bar (#2) (exact) (z'=3)	a, c p11n (#5) (exact) (z'=3)		yes		yes		(NA)				Rather weak H bonding between units -NH-C(=O)-N(Cl}OMe. Chains 3->5->3… but 3->5 is 3.36 Å (sumVDW+0.29 Å). Linear tetramer 6->2->4->1 have contacts < sumVDW+0.14 Å but contact 1->6 is 4.50Å. Obvious structural layers (0 1 0) but the (quite weak) H bonds are between layers. The layer at y=0 (#3,4,6) has symmetry p1-bar (#2) while the layer at y=1/4 (#1,2,5) has symmetry p1n1 (std p11n, #5). The l…	JUXJIX
6	A	KITQIN	1	(0 0 1)	2	2		2	A/ 4,5 B/ 1,2,3,6	A,B,A,B,…	corrugated	a, [1 2 0] c211 (#10)	a, [1 2 0] c211 (#10), z'=2			yes		yes	0.1	layer packing			Rows along [0 1 -1] containing molecules in two very different orientations (||||=||||=||…; #3,2,1,6 and #4,5). Molecular conformations in the two groups are quite different. Alternating layers (0 0 1) of #4,5 and of #3,2,1,6. The layer axes, a and [1 2 0], make angle 90.13 deg.	KITQIN
5	A	KIWVES	2	(0 0 1)	2	2		2	A/ 3,4,5,3',4',5' B/ 1,2,1',2'	A,B,A,B,…	corrugated	a, b p1-bar (#2) (exact), z'=3	a, b p1-bar (#2) (exact), z'=2		yes			yes	(NA)		1-D		A vic-diol. Two types of H-bonded chains along a. The bilayer A around z=0 is built from #3,4,5; the layer B at z=1/2 is built from #1,2. In the #1,2 chain an OH in #1 is involved in only one H bond while an OH group in molecule #2 participates in three. The chains around z=0 are simpler but there is twofold disorder (64:36) of molecule #4.	KIWVES
6	A	LEXVEP01	2	(0 1 0)	3	2	1-bar (relates A,A')	2	A/ 1,4,5,6 B/ 2,3,2',3'	A,B,A',A,B, A',...	flat	a, c pba2 (#25)	a, c p2(1)/b11 (#17) (1-bars exact)			yes	yes		0				(The original authors described the structure as layered). The two independent layers are actually very similar; they differ only in the alternation patterns of the conformational enantiomers. The conformational difference is the sense of twist of the CH2CF2CF2CH2 part of the C4H4F4O2P ring. The P atom is also part of a P3N3 ring having four F substituents.	LEXVEP01
5	A	LIRXIU	2	(0 0 1)	4	3	1-bar	3	A/ 1,1' B/ 2,3,4 C/ 5,5'	A,B,C,B',A,…	corrugated	a, b p1-bar (#2) (exact)	a, b p1 (#1), z'=3	a, b p1-bar (#2) (exact)	A, C only (not B)		yes	yes	(NA)	packing in B is very different than packing in A and C	0-D in A, C?		Two of five calixarenes form pairs around 1-bar sites in layers at z=0 (A) and z=1/2 (C); there may be intermolecular H bond connecting the pairs. The packing in those two layers is not the same. The other three calixarenes have no special interactions and form columns at z=0.25 with good 3(1) axes along a (layers B). There is Included p-xylene in layer A (1.5 molecules) and C (one molecule). (No…	LIRXIU
5	A	MOQJAE	33	(0 0 1)	4	2	2(1), n glide	2	A/ 1,2,3,4 B/ 5	A,B,A',B,',A,B, …	flat	b, a p2(1)/b11 (#17), z'=2 (glides exact)	b, a pb11 (#12) (exact)		B only	yes for A	yes		(0 by sym)				Three conformations: #1/#4, #2/#3, and #5. The approximate inversion centers and 2(1) axes in layer A relate #1&4 as well as #2&3.	MOQJAE
8	A	OKOXIW	1	(0 0 1)	2	2		2	A/ 1,2,6,8 B/ 3,4,5,7	A,B,A,…	corrugated	a, b p211 (#8), z'=2	a, b p2(1)11 (#9), z'=2			yes	yes	yes	0		1-D		Layers (0 0 1) at z ca 0.1 (p211, #8) and z ca 0.6 (p2(1)11, #9); each contains H-bonded columns along a of diols (#1&8 and #2&6 at z ca 0.1; #3,7,4,5 at z ca 0.6) but the columns are very different. The layers are linked by two weaker -OH...NC- bonds (#1,3 at z ca 0.2; #6,7 at z ca 0.9). The cell angle beta= 94.9° means there can be no approximate monoclinic symmetry.	OKOXIW
6	A	OTOLIC04	14	(0 1 0)	6	2	c glides relate A&A', B& B', B''& B'"	2	A/ 5,6,5',6' B/1,2,3,4	A,B,B',A', B'',B''',A,...	corrugated	a, c (or c, a) p1-bar (#2) (exact), z'=2	c, a p2(1)11 (#12), z'=2		A only		yes		4.4		0-D		Fourth polymorph of o-toluic acid with approximate 1-bar dimers (z'=2 in both layers). Layer (0 1 0) at y=0 z(#5&6) has exact symmetry p1-bar (#2); the dimer centroids are offset from the the closest 1-bar site by 0.14, -0.02, 0.08 (1.9 Å). The layer at y=0.17 has approximate symmetry p2(1)11 , but the axes are less perpendicular (beta=94.4°) than in most cases (acos(beta)/c=-0.08). Neither layer…	OTOLIC04
6	A	PIPQUA	2	(1 0 0)	2	2		2	A/ 1,2,1',2' B/ 3,4,5,6, 3',4',5',6'	A,B,A,B,…	flat	b, c p1-bar (#2) (centered; half of 1-bars exact)	b/2, c p1-bar (#2), z'=2; half of 1-bars exact)			yes	yes		(NA)			[0 1 1]/2 in layer A; b/2 in layer B	1,8-Di-iodonaphthalene. Two kinds of layers (1 0 0). Molecules #1,2 in layer at x=0; layer symmetry is a1-bar (#2) (ie, p1-bar with pseudotranslation [0 1 -1]/2). Molecules #3-6 in layer at x=1/2, which has two different stacks along b with molecules related by a pseudotranslation b/2. The two stacks (#3,4 and #5,6) are separated by c/2 but the tilts differ a little and alpha=77 deg so that there…	PIPQUA
6	A	QUJSAP	2	(0 0 1)	2	2		2	A/ 2,4 B/ 1,3,5,6	A,B,A,B,…	flat	a, b p1-bar (#2) (exact); z'=2	a, b/2 p1-bar (#2); half of 1-bars exact); z'=2		A only		yes		(NA)			b/2 in layer B	The two molecules in layer A are conformationational enantiomers but are not related by any obvious approximate symmetry. In layer B there are two pairs of molecules related by the b/2 (#1&5; #3&6); the two pairs are not related by any obvious approximate symmetry.	QUJSAP
6	A	QUYNUU	14	(0 1 0)	6	2	2(1); 1-bar	2	A/ 3,4,5,6 B/ 1,2,1',2'	A,B,A',A'',B',A''',A,…	corrugated	c/2, a pb11 (#12)	c, a pb2(1)a (#33) (a glide exact)			yes	yes		0.3	molecular orientations	2-D	c/2 in layer A	Two kinds of -OH...OH...O= bonded layers (0 1 0). Layer at y=0.09 (#3,4,5,6) has all the organic rings on the same side; there is an approximate a glide and a quite approximate c/2 pseudotranslation to give p11a (std pb11, #12; c'=c/2). Layer at y=1/4 (#1,2) has organic rings protruding from both side and approx sym p2(1)ca (std pb2(1)a, #33)]. The local pseudo glides perpendicular to c (beta 90.…	QUYNUU
6	A	SEBZUV	14	(1 0 0)	3	2	2(1); 1-bar	`	A/ 1,6,1',6',1",6", 1"',6"' B/ 2,3,4,5,2',3', 4',5'	A,B,B',A,…	flat	b, c p2(1)/b11 (#17) (exact), z'=1	b, c p2(1)/b11 (#17) (glide exact), z'=2		A only			yes	(0 by sym)	molecular orientations			Pairs of molecules #1,6, #2,3, and #4,5 have the same conformation but between pairs the p-Cl-Ph ring rotations vary (avgs 4.1, 19.1. 22.8°) Double layers A'/A at x=0 and B/B' at x=1/2 have symmetry p2(1)/b11 (#17) for axes b and c. Local 1-bar sites at 0.33, 0.40, 0.32 that relate pairs #2,3 and #4,5 in layer B are quite exact but the y coordinate should be 0.50. A corresponding approximate 1-ba…	SEBZUV
6	A	UYOPAA	19	(0 0 1)	4	2	2(1)s	2	A/ 4,6,4',6' B/ 1,2,3,5, 1',2',3',5'	A,B,A',B', A,…	flat	a, b p2(1)11 (#9)	b,a c211 (#10) [2(1)s exact]		A only	yes for B	yes	yes	(0 by sym)		1-D in half of A; 0-D (tetramers) in B		Four molecules (#1,2,5,3) make an H-bonded ring at z ca 0.25 with a good 2 around b. Molecule #4 makes H-bonded chains along a at y,z = 1/4, 1/2 and 3/4, 0. Molecule #6 is is in the layer with #4 at z = 0 and z = 1/2 but makes an H bond only to #1 in the z=1/4 layer. The layers (0 0 1) at z=0, 1/2 have symmetry p2(1)11 (#9) with Z'=2; the layers at z=1/4, 3/4 have exact symmetry p12(1)1 (#9) and …	UYOPAA
6	A	WIYSAZ	1	(0 0 1)	2	2		2	A/ 3,4,5,6 B/ 1,2	A,B,A,…	flat	a, b p2(1)11 (#9), z'=2	a, b p1-bar (#2)			yes	yes		0.8	Layer A is enantiomerically pure; B is racemic	0-D		Molecule #2 (of 6) is the "other" enantiomer and seems to be disordered (0.59/0.41) with a related diastereomer. Two dimers (#3,5, #4,6) with approx sym 2 (but not in a special direction) make a double layer approx sym p2(1)11 (#9)] at z=0; the screw axes relate dimers. The 3rd dimer (#1,2) has approx 1-bar sym [approx layer sym p1-bar (#2)]. There are also layers (1 0 1) with dimers lined up alo…	WIYSAZ
5	A	YAJJEA	5	(1 0 0)	4	2	C center-ing	2	A/ 1,2,3,4,1',2',3',4' B/ 5,5'	A,B,A',B,',A,B, …	flat	b, c p211 (#8) (exact), z'=4	b, c p2(1)11 (#9) (exact)		yes		yes	yes	(0 by sym)	H-bond patterns	0-D in A; 1-D in B		#1,2 and #3,4 form dimers. The two dimers are very similar and the pair has approimate 222 symmetry; the approximate symmetry of the dimer pair, however, is local because the twofold axes are not well aligned with any special crystallographic direction. The fifth molecule forms H-bonded chains along b using the 2(1) axes of the C2 cell. Two water molecules are disordered over twofold sites, form …	YAJJEA
5	A	YUKLIB	19	(0 0 1)	4	2	2(1)	2	A/ 4,5,4',5' B/ 1,2,3.1',2',3'	A,B,A',B,', A,B, …	corrugated	a, b p2(1)11 (#9) (exact), z'=2	b, a p2(1)11 (#9) (exact), z'=3		yes			yes	(0 by sym)		0-D		Layers (0 0 1). The layer at z = 0, 1/2 is composed of NH...O= dimers (molecules #4,5); the dimers have very good local twofold symmetry but those axes are not close to the unit-cell or layer axes, The layers at z = 1/4, 3/4 are composed of H bonded linear trimers that include a dimer (molecules #1,2; approximate local twofold symmetry). The layers interpenetrate somewhat. No pseudosymmetry. Laye…	YUKLIB
23	23	23	23	23	23	23	15	23	23	23	23	23	23	1	14	14	19	10	23	9	14	6	23	23
