# Supplementary material for: Pseudosymmetric layers in high-Z′ and P1 structures of organic molecules
Source: Royal Society of Chemistry journal article supplement (doi:10.1039/d0ce00302f), 2020-01-01
Supplement: d0ce00302f3.xlsx [file d0ce00302f3.xlsx]

## Sheet: Stkd Layrs
Z'	Type of Stack	Refcode	Spc Grp #	Layer hkl	# Layrs in Cell	# Sym Ind Layrs in Cell	Sym Relating Layers (other than trans)	Molecules in Layers	Stacking Pattern	Flat, Wavy or Corrugated?	Layer axes; layer hkl	|in-plane angle - ideal value|, deg	Layer bounds, fract coords	Approx layer symmetry (z'=1 unless specified)	3rd axis	In-layer offset, Å	Out-of-layer offset(s), Å	Strong inter-actions (eg, H Bonds) in Layers?	Trans-lational Mod Within Layer? (orig cell)	Other	Comments	Refcode
12	S	ACOMOW	2	(0 1 1)	6	3	1-bar	A1/ 1,2,3,4 A2/ 5,6,11,12 A3/ 7,8,9,10 (isonicotin-amide #s)	A1,A2,A3, A3',A2',A1', A1,…	flat	a, [0 1 -1] (0 1 1)	0.07	well separated	pbam (#44)		(near 0.0)	(large)	1-D			Three nearly identical layers (0 1 1) composed of four formula units each. H-bonded ribbons along a with isonicotinamides central and cyclopropanecarboxylic acids on the outside. Layer symmetry approximately pbam (#44) but rotation of amide group relative to 4-pyridinyl ring (+19 to -22°) means layers are not quite planar, Axes of approx layer cell are [1 0 0] and [0 1 -1}, which make an angle 89…	ACOMOW
6	S	CEGBAS	169	(0 0 1)	6	1	6(1)	A/ 1,2,3,4,5,6 (-0.1<z<0.1)	A,A',A'',A''',A'''',A''''', A...	wavy	a, b (0 0 1)	0	well separated	p6/m (#75)	c	(NA)	(large)	2-D		Deviations from planarity are largest for #1 and smallest for #4, #6	Three RC(=O)NH2 dimers (#1,4, #2,5, #3,6) linked into a hexagonal nets (0 0 1) by NH…O'= bonds; approximate layer symmetry is p6/m (#75). The sixfold rings enclose CHCl3 molecules that lower the pseudo symmetry to p3 (#65) A small degree of buckling of layers also breaks the symmetry. Sheets are stacked by the 6(1) axis but that axis (at the origin) is substantially offset from the layer sixfold …	CEGBAS
6	S	CEGBEW	2	(1 -1 -1)	2	1	1-bar	A/ 1,2,3,4,5,6	A,A',A,...	corrugated	[1 0 1], [0 1 -1] (1 -1 -1)	2.6	well separated	p6/m (#75)		0.03	(large)			layer axes 21.20, 21.24Å; the buckled layer has approx sym p6 (#73) in projection	Same as CEGBAS except that (1) included solvent is n-propanol rather than CHCl3, (2) layers are (1 -1 -1) [rather than (0 0 1)], layers are related by intermediate 1-bar sites, and (3) layers are quite buckled (so that OH..O= bonds can form to the solvent in the middle of the rings?) and so have 6 (or 6/m) symmetry only in projection. Authors call CEGBAS a Type 1 solvate and CEGBEW (also CEGBOG a…	CEGBEW
8	S	COCMIR02	2	(1 0 0)	8	4	1-bar	A1/ 1,2 A2/ 3,4 A3/ 5,6 A4/ 7,8	A1,A2,A3, A4,A4',A3', A2',A1', A1,...	flat	b, c (1 0 0)	(NA)	well separated	p112/m (#6)	a	(NA)	(large)	0-D		pseudotranslation [1 0 1]/4, rmsd 0.73 Å	COCMIR02 at 120 K is the modulated form of COCMIR01 (145 K) and COCMIR (200). Powder data in range 473-16 K reported; only the one phase transition was found. COCMIR and COCMIR01 have layers (1 0 -1). COCMIR02 has a pseudotranslation [1 0 1]/4. With increased tolerances PLATON suggests a transformation of COCMIR02 by (1/4 0 -1/4 | 0 1 0 | 1/4 0 -3/4), The transpose of that matrix turns [1 0 0] fo…	COCMIR02
6	S	DEZQUW	2	(1 1 1)	3	2	1-bar (relates B,B')	A1/ 1,2,1',2' A2/ 3,4,5,6	A1,A2,A2', A1',A1,…	flat	[1 -1 0], [-1 0 1] (1 1 1)	(NA)	well separated	p112/m (#6) (1-bars exact in layers A)		(NA)	(large)			approx local 2s and 2(1)s in layers	2-(4-Methylphenyl)-5-phenyl-2,4-dihydro-3H-pyrazol-3-one. If the layers were planar the phenyl and tolyl rings would have to be coplanar with the central pyrazole ring. While thr three rings are not coplanar the twists are small.	DEZQUW
6	S	FITQAA	2	(1 0 0)	4	2	1-bar	A1/ 1,2,3 A2/ 4,5,6	A1,A2,A2', A1', A1,…	flat	b, c (1 0 0)	0	0.0 < x < 0.3; 0.3 < x < 0.5	p6-bar (#74)	a	0	0.06, -0.33	0-D	([1 0 0]/2 for the whole structure)	layer axes 12.02, 12.04 Å; layers A, B related by local 2(1) along a (or by inversion)	Each layer (1 0 0) contains one of the two H-bonded trimers. The two trimers are related by a pseudo 1-bar at 0.25, -0.05, 0.00 or by local 2(1) axes.	FITQAA
6	S	KAYGUO	2	(0 0 1)	6	3	1-bar	A1/ 9,10,11,12 A2/ 1,2,3,4 A3/ 5,6,7,8	A1,A2,A3, A3',A2',A1', A1,…	flat	a, b (0 0 1)	(NA)	well separated	p112/m (#6)	c	(NA)	(large)	1-D	([3 -2 1]/6 for the whole structure)	gamma=90.3, but that seems to have no special significance	1:1 N-(pyridin-2-yl)isonicotinamide succinic acid (Nic:SA). Layers (0 0 1) of two formula units each. One SA forms two H bonds (one rather long) to each of two Nics; the other SA forms one bond to each. The OH...N/NH...O-bonded units are chains. CH...O interactions link chains into the layers (approx sym p112/m, #6), with pseudo 2/m sites at the two different SA centers. Overall the structure has…	KAYGUO
6	S	LITNIM	1	(0 1 0)	1	1	(NA)	A/ 1,2,3,4,5,6 (0.1<y<1.1)	A,A,...	flat	a, c (0 1 0)	1	well separated	p2(1)11 (#9), z'=3	b	0.04	0.23				Three different conformations (#1&4, #2&6, #3&5). #1, 2 differ at one torsion angle, #2, 3 differ at another, and #1,3 differ at two. Along a molecules #1,3,2 near x=0 are related to #4,5,6 near x=1/2 by a good 2(1) at x,0.59,0.57. Two water molecules are present.	LITNIM
6	S	OKEJOE	2	(0 2 1)	2	1	1-bar	A/ 1,2,3,4,5,6	A,A',A,...	flat	a, [1 1 -2]/3 (0 2 1)	(NA)	well separated	p112/m (#6) (without solvents)		(NA)	(large)	2-D	[1 1 -2]/3 (and [1 -2 1]/3)	Pseudotranslation [1 1 -2]/3	Inclusoion compound. Host is 3,5-dihydroxybenzoic acid; guests are DMSO and water. The guest molecules do not conform to the approximate layer symmetry of the host. There is interlayer H bonding through the solvent molecules.	OKEJOE
6	S	OKEKEV	9	(0 0 1)	6	3	c glide	A1/ 1,2 A2/ 3.6 A3/ 4,5 (#s for DHBA molecules)	A1,A2,A3, A1',A2',A3', A1,…	flat	a, b (0 0 1)	0	well separated	cmmm (#47) (without solvents)	c	0	(large)	2-D			Inclusion compound. Host is 3,5-dihydroxybenzoic acid; guests are acetone and water. The guest molecules do not conform to the approximate layer symmetry of the host.	OKEKEV
8	S	PAVLAB	9	(0 0 !)	4	2	c glide	A1/ 1,4,6,8 A2/ 2,3,5,7	A1,A2,A1', A2', A1,…	flat	a, b (0 0 1)	0	-0.2 < z < 0.1; 0.1 < z < 0.4	p4-bar (#50)	c	0	(large)	0-D		layer axes 26.27, 26.34 Å; p4-bar sym would require confor-mational changes in #3, #5, and #6	Layers (0 0 1) of two amide dimers each, with the dimers linked further to give a 2-D net. Approx planar layers have approx sym p4-bar (#50) but for 180° rotations around an N-C bond in molecules #6, #3 and #5, There are approximate 1-bar sites in three dimers, but the fourth (#1&4) has approximate symmetry 2 instead; in p4-bar all dimers would have symmetry 2. Adjacent layers are well related by…	PAVLAB
8	S	POVYEG	2	(1 0 0)	2	1	1-bar	A/ 1,2,3,4,5,6,7,8 (0.0<x<0.5)	A,A',A,…	flat	b, c (1 0 0)	0.9	0,0 < x < 0.5	p-4b2 (#60)	a	-0.02	-0.13	0-D		b=24.93, c=25.65 Å	Tricyclic alcohol. Two independent but very similar tetramers with -OH donors and -OMe acceptors (even though two carbonyls are present). Conformation of -OSi(Me2)(t-Bu) group is somewhat variable. Tetramers have approximate 4-bar symmetry. Layers (1 0 0) have approximate symmetry p-4b2 (#60) (c-b=25.65-24.93=0.72 Å or 2.8%; alpha=90.90 deg). Layers are related by inversion symmetry.	POVYEG
6	S	QARNAA	1	(1 1 -1)	3	3	(NA)	A1/ 2,4 A2/ 5,6 A3/ 1,3	A1,A2,A3, A1,…	flat	[0 1 1], [1 -1 0] (1 1 -1)	2.4	well separated	p6 (#73), z'=1/3 [or even p6/m (#75?)]	[1 1 0]	0.04	(large)		([0 1 0]/3 for the whole structure)	layer axes 26.95, 27.58 Å; layer sym would be approx p6/m but for terminal sec-Bu groups	PLATON says there is a 93% chance of P1-bar, but the paper gives a solid-state CD spectrum that indicates enantiomeric purity. Molecules are achiral except for terminal sec-Bu groups; the conformations of the three sec-Bu groups and three methoxy groups vary. There may be diastereomeric disorder at one site in molecule #1 because one CH(Me)(Et) group is nearly planar. Layers (1 1 -1) have approx …	QARNAA
8	S	RAKBUC	1	(1 0 0)	1	1	(NA)	A/ 1,2,3,4,5,6,7,8 (0.1<x<1.0)	A,A,...	flat	b/2, c (1 0 0)	0.3	well separated	p2(1)2(1)2 (#21)	a	0	0.44 0.27			pseudotranslation [0 1 0]/2; rmsd 0.95 Å	Straightforward layered structure but with higher approximate symmetry than most.	RAKBUC
6	S	RIKNOO	2	(-1 2 3)	1	1	1-bar	A/ 1,2,3,4,5,6, 1',2',3',4',5',6'	A,A',A,...	flat	[1 -1 1], [2 1 0] (-1 2 3)	0.18	well separated	pbam (#44), (1-bars exact), z'=3		(very small)	(large)	0-D		Local symmetry of H-bonded trimer is 3/m = 6-bar	Two independent H-bonded trimers that form centrosymmetric layers in (-1 2 3). The trimers in a layer are related by local twofold screw axes and glides along [1 -1 1] and [2 1 0], which make an angle of 90.2°; the idealized layer symmetry is pbam (#44). The trimers are also stacked by [1 1 1]/4 (with offsets and intervening 1-bar sites), which makes an angle of 28.2° with the normal of (-1 2 3).…	RIKNOO
6	S	TADWIH	2	(1 -1 0)	1	1	(NA)	A/ 1,2,3,4,5,6, 1',2',3',4',5',6'	A,A,...	flat	[2 2 -1]/6, c/2 (1 -1 0)	(NA)	well separated	p112/n (#7), z'=1/2 (std p112/a) (1/6th of 1-bars exact)		(NA)	0.28		([2 2 -1]/6 for the whole structure)	pseudotranslation [2 2 -1]/6, rmsd 0.39 Å	Bilayers (1 -1 0) contain all six molecules, which have approximate twofold symmetry with the axis perpendicular to the layer. The structure as a whole has a pseudotranslation of [2 2 -1]/6, which lies within the layer, as do [1 1 1]/3 = [1 1 0] - 2*[2 2 -1]/6 and [0 0 1]/2 = [1 1 0] - 3*[2 2 -1]/6. For axes [2 2 -1]/6 and [0 0 1]/2 the approximate layer group is p112/n (#7, std setting p112/a).	TADWIH
7	S	TCLOBQ01	14	(1 0 -1)	7	4	1-bar, 2(1), n glide	A1/ 1,1' A2/ 2,3 A3/ 4,5 A4/ 6,7	A1,A2,A3, A4,A4',A4', A2',A1',A1,...	flat	b, {1 0 1] (1 0 -1)	0	well separated	pbam (#44) [p2(1)/b11 for A1; pb11 for A2-A4 exact]	[1 0 -1]	0	(large)				o-Chloranil, C6 CL4 O2. There is a pseudotranslation [2 0 1]/7 that relates the layers (1 0 -1).	TCLOBQ01
6	S	TORHAK	1	(1 0 -1)	1	1	(NA)	A/ 1,2,3,4,5,6	A,A,...	flat	b, [2 -1 2]/3 (1 0 -1)	3	well separated	c211 (#10)	[-2/3 1/3 1/3]	0.05	0.32			pseudotranslation [2 -1 2]/3, rmsd 0.92 Å	The H-bonded dimers lie on approximate twofold axes along b in layers (1 0 -1). The other layer axis (the pseudotranslation direction) is [2 -1 2]/3 = [1 0 1] - [1 1 1]/3; its angle with b is 93.0°, which gives the approximate layer group c211 with z=4 and z'=1.	TORHAK
6	S	UHIPAD	4	(0 0 1)	3	2	2(1) ⊥ to layer normal relates A1&A1'	A1/ 1,3,4,6 A2/ 2,5,2',5'	A1,A2,A1', A1,…	corrugated	a, b (0 0 1)	0	some inter-penetra-tion	p2(1)2(1)2 (#21)	c	0	(large)	NH…O=	0-D (2-mers)		The orientation of the dimers in the two layers are not quite the same, but do not differ enough for a categorization of an SR or A structure.	UHIPAD
6	S	XODGAA	1	(0 0 1)	1	1	(NA)	A/ 1,2,3,4,5,6 (-0.1<z<0.9)	A,A,...	flat	[1 -1 0]/3, [1 1 0] (0 0 1)	0	well separated	c211 (#10)	c	0	0.29			pseudotranslation [1 -1 0]/3 with rmsd 2.04 Å	Conformations differ. The p-NO2-Ph rings stack along [1 -1 0]. The cages at the other end stack in an AABAAB pattern (ie, an ordered fault). Transformation (1 1 0 | 0.333 -0.333 0| 0 0 -1) gives Z=4 and gamma=90.0° (alpha=93.9°). Approximate 2 and 2(1) axes are rotated a few degrees from [1 -1 0], which is essentially perpendicular to {1 1 0].. The pseudotranslation is rather approximate. Overall…	XODGAA
6	S	XOZBUK01	2	(0 1 1)	3	2	1-bar	A1/ 3,5,3',5' A2/ 1,2,4,6	A1,A2,A2', A1,…	flat	a, [0 1 -1] (0 1 1)	(NA)	well separated	p112/m (#6), z'=2 (1-bars exact in layer A2)		(NA)	(large)			(0 1 -3) is another possible layer but it has no pseudosymmetry	Molecules have long axes along a. There are obvious layers (0 1 1) containing #1,2,4,6 or #3,5. The layer symmetry for both is approximately p112/m (#6) with z'=2; the 1-bars are exact in the #3,5 layer. In the layers there are glide-like operations along a but the translations are not even close to a/2. The layers (0 1 -3) contain all six molecules; in these layers there is an apparent orientati…	XOZBUK01
6	S	YEZDEN	2	(1 0 0)	3	2	1-bar	A1/ 3,4,5,6 A2/ 1,2,1',2'	A1,A2,A2', A,…	flat	b, c (1 0 0)	0	well separated	pbam (#44)	a	0.00, 0.00	(large)	0-D	([1 -1 1]/3 for the whole structure)		RCOOH dimers. Layers (1 0 0) separated by a/3; if layers were a little more planar the layer symmetry would be very good pbcm (std pbam, #44; alpha = 90.00°) but the corresponding group without the mirror (pba2, #25) doesn't have the 1-bar sites found in the dimers in the layer at x=1/2 (A2). In layer A1 the 1-bar symmetry of the dimers is only approximate. A pseudotranslation [2 1 -1]/3 relates …	YEZDEN
8	S	ZATLAJ03	4	(0 1 0)	2	1	2(1) ∥ to layer normal	A/1,2,3,4,5,6,7,8 (0.1<y<0.6)	A,A',A,,...	flat	c/2, a (0 1 0)	1.62	well separated	p2(1)/b11 (#17)	b	-0.02	(large)	2-D	c/2	layers are separated by included solvent. Pseudotranalation [0 0 1]/2, rmsd 0.18 Å	Benzene-1,2-diaminium sulfate (Z'=8) plus eight water molecules and two extra sulfuric acid molecules, which are reported to have donated one H+ each to water molecules. Layers of benzene-1,2-diaminium sulfate include some of the extra water molecules. The layers are separated by the remaining water molecules and the hydrogensulfate ions. The 2(1) axes relating adjacent layers guarantee that the …	ZATLAJ03
6	S	ZZZZCA03	2	(1 4 0)	1	1	1-bar	A/ 1,2,3,4,5,6, 1',2',3',4',5',6'	A,A,...	flat	c, [4 -1 0] (1 4 0)	(NA)	well separated	p112/m (#6), z'=6	b	(NA)	(large)	0-D		layer (1 -2 0) has approx sym p2(1)/b11 (#17), z'=3; glide is same as as one of those in (1 4 0)	p-(n-Hexyloxy)benzoic acid. The curved, centrosymmetric packing unit is formed from three RCOOH dimers. Three possible layers. The thinnest, (1 4 0) has approximate symmetry p112/m (#6) with axes c and [4 -1 0].	ZZZZCA03
6	S/SR	DATTAV	14	(1 0 0)	4	1	1-bar, 2(1), n glide	A/ 1,2,3,4,5,6 (0.0<x<0.3)	A,A',A'',A''',A,…	flat	b, c (1 0 0)	0	0.0 < x < 0.2	pb2(1)m (#29). Z'=3	a	0	-0.28	0-D		Local symmetry of H-bonded trimer is 3/m = 6-bar	Layers (1 0 0) containing two different trimers The two trimers in a layer each have local threefold symmetry and are related by an approximate c glide or 2(1)s along c; the approximate layer symmetry is pmc2(1), (std pb2(1)m, #29). The layers are stacked by a/4; adjacent layers are related by inversion centers on one side and by 2(1) axes on the other; both reverse the polarity of the cell axis …	DATTAV
8	S/SR	QUQQUO	2	(0 -1 2)	2	1	1-bar	A/1,2,3,4,5,6,7,8	A,A',A,...	flat	a, [1 2 1]/2 (0 -1 2)	0.23	well separated	pba2 (#25)	[0 1 -1]	(near 0.0)	(large)		[1 2 1]/2	Pseudotranslation [1 0 1]/2, rmsd 0.52 Å (or, in layer, [1 2 1/2 = [1 0 1]/2 + [0 1 0])	(Me3Si)2As-As(SiMe3)2. The conformational enantiomers have twists in opposite senses around the As-As bond. No 3-D cell with approximate symmetry seems possible.	QUQQUO
8	SR	CICTIT	1	(0 0 1)	4	4	(NA)	A1/ 1,5 A2/ 2,6 B1/ 3,7 B2/ 4,8	A1,A2,B1, B2,A1,...	wavy	a, b (0 0 1)	0.1	well separated	p4 (#49), z'=1/2		(near 0.0)	(large)	2-D		layer axes 14.73, 14.84 Å; C and D are rotated by 180° around a (or b) relative to A and B	C26 H28 (OH)2 molecules lie on approximate twofold axes. The waviness of the layers does not degrade the approximate p4 symmetry very much.	CICTIT
10	SR	COVBEV	1	(0 0 1)	5	5	(NA)	A1/ 3,5 B1/ 2,7 B2/ 8,10 B3/ 1,4 A2/ 6,9	A1,B1,B2, B3,A2, A1,…	corrugated	b, a (0 0 1)	0.01	well separated	p2(1)11 (#9)	c	(near 0.0)	(large)	1-D		Layers A and B are related by a 180° rotation around c*	Five very similar layers (0 0 1) containing H-bonded chains. The layers have approximate symmetry p12(1)1 (#9) if the substantial buckling is ignored. Three layers have their C=O groups pointed towards +b and two, which are adjacent (z = -0.04 and 0.16), have their C=O groups pointed towards -b. Layers can be overlaid by translation if those in one set (eg, at z = -0.04 and 0.16) are rotated by 1…	COVBEV
8	SR	ELAJEI	2	(0 1 0)	4	2	1-bar	A/ 1,2,7,8 B/ 3.4.5.6	A,B,B',A', A,…	flat	a, c (0 1 0)	0.03	0.0 < y < 0.3; 0.2 < y < 0.5	pb11 (#12), z'=2	b	(near 0.0)	(large)	1-D		Layer B is related to layer A by an approximate glide	The layers (0 1 0) include chains of benzyl subsituted tetrazoles with the molecules in the chain linked by NH…N= bonds. The layers include good c glides perpendicular to a so that the approximate layer symmetry is pc11 (std pb11, #12) with z'=2. There are VERY approsimate 2(1) axes along a. Layers not related by the inversion centers are related by an approximate local glide per[endicular to b w…	ELAJEI
6	SR	FADQAF	4	(0 0 1)	2	2	(NA)	A/ 4,5,6,4',5',6' B/ 1,2,3,1',2',3'	A,B,A,…	flat	b, a/3 (0 0 1)	0	-0.3 < z <0.3; 0.2 < z < 0.8	p2(1)11 (#9) (33% of 2(1)s exact)	c	0	0	2-D	(a/3 for the whole structure)	Layers A, B related by approximate 2(1) along c*; pseudotranslation [1 0 0]/3, rmsd 1.47 Å	Substituents COOH, OH, Me, and C-C=C=C on a saturated pyran ring; the last of these substituents has two conformations in an AABAAB... pattern along a (#3, #4 are the Bs). Two layers (0 0 1) with 2-D H-bonding C(=O)OH…OH…O= ; the layers can be superposed fairly well if one is rotated by 180° around c* and then translated. There is a pseudotranslation a/3 that is degraded by the conformational dif…	FADQAF
6	SR	GIPLID	1	(0 0 1)	3	3	(NA)	A/ 5,6 B1/ A,2 B2/ 3,4	A,B1,B2,A,…	flat	a, b (0 0 1)	(NA)	well separated	p1-bar (#2)	c	(NA)	(large)			Layers A and B related by an approximate 180° rotation around c*	Kryptoracemate. H-bonded RCOOH dimers #1&2, #3&4, #5&6 have approximate inversion symmetry. Two different types of layers (0 0 1) (#5&6; #1&2, #3&4) all have approximate symmetry p-1. The second and third are offset but also have a different orientation than the first. Layers (1 0 1) suggest a [1 1 -1]/3 pseudotrans but 1 of the 3 dimers has a different center and orientation (ordered fault). (Wi…	GIPLID
6	SR	HASYUX	1	(0 0 1)	3	3	(NA)	A/ 1,2 B/ 5,6 C/ 3,4	A,B,C,A,…	flat	[0 1 0], [2 -1 0]; [1 0 0], [1 -2 0]; [-1 1 0], [1 1 0] (0 0 1)	0.2	0.1<Z<0.5; 0.5<z< 0.8; 0.7<z<1.1	c211 (#10)	c	0	0.24, 0.54			layer axes 15.34, 15.37 Å; adjacent layers related by local 3(1)s along c* but origins vary	Molecules are related to heptahelicene and so are chiral. All six are the same except for differences in one of their two -C3H7CL groups; the group that differs is also disordered. Layers (0 0 1) spaced by c/3 have approximate symmetry c211 (#10) except in the region of the disordered groups. The three layers are related by ca 120° rotations (gamma 60.2°; a-b = 0.03 Å) but there are offsets betwe…	HASYUX
6	SR	KOFTEG	145	(0 0 1)	6	2	3(2)	A/ 2,3,5 B/ 1,4,6	A,B,A',B', A'',B'',A...	flat	a, b (0 0 1)	0	well separated	p3 (#65)	c	0	(large)			3s are approx only because one molecule is a conformational isomer of the others	Stack of layers (0 0 1) of #2,3,5 and of #1,4,6. Conformational kryptoracemate; molecules #2,3,6 are the conformational enantiomers of molecules #1,4,5; each layer contains two of one conformational enantiomer and one of the other. Layers include approx 3-folds but they relate conformational enantiomers (torsion angles of Ph and 4-NO2-Ph rings are +, - ca 30 and 35°.). Planar layer would have sym…	KOFTEG
6	SR	LADQAL	76	(0 0 1)	4	1	4(1)	A/ 1,2,3,4,5,6 (-0.1<z<0.1)	A,A,...	flat	a/3, b or b/3, a (0 0 1)	0	well separated	p2(1)2(1)2 (#21) or pba2 (#25?), z'=1/2	c	0	90° rotation between layers		a/3 at z=0, 1/2; b/3 at z=1/4, 3/4	AABAAB... up/down alternation pattern of the oxazole rings in each row of the layer	4-Fluoro-3,5-diphenyl-1,2-oxazole. Layers (0 0 1) have a herringbone arrangement. In projection along c there is a pseudotranslation of a/3 (at z=0, 1/2) or b/3 (at z=1/4, 3/4) but it is broken by the up/down pattern (AABAAB...) of the orientation of the oxazole (ie, C3NO) rings. There is nearly complete N/O disorder so that the molecule can lie on approximate twofold axis. The relationship betwe…	LADQAL
8	SR	LUMJUZ	4	(0 1 0)	4	2	2(1)	A/ 1,2,4,5 B/ 3.6.7.8	A,B,A',B', A,...	flat	c, a (0 1 0)	0.1	0.1 < y < 0.2; 0.1 < y < 0.4	p2/b11 (#16)	b	(near 0.0)	(large)	0-D		Layers A and B can be overlaid in projection but the overlaid molecules are enantiomeric	Kryptoracemate; #1,2,6,8 and #3,4,5,7 are homochiral. Two dimers (one R+R, one S+S) in each layer (0 1 0); Approx layer sym is p112/a (std p2/b11, #16) but the axes 2 are somewhat rotated out of the plane; the glides are more exact.. PLATON finds that adjacent layers are related by approximate inversion centers, but the x and z coordinates of those centers show no pattern that would indicate over…	LUMJUZ
8	SR	LUMYAT	7	(1 0 0)	4	2	a glide	A/ 1,2,5,6 B/ 3,4,7,8	A,B,A',B', A,...	flat	b, c (1 0 0)	0	0.0 < x < 0.3; 0.3 < x < 0.5	pba2 (#25)	a	0	0.00, -0.10 (per layer)	0-D		layers A and B' are related by a pseudo 1-bar at 0.01, 0.12. 0.32	Heterochiral layers (1 0 0) of homochiral oxime dimers (# 1&2, #3&4, #5&6, #7&8; each has approximate symmetry 2). The layers have approximate symmetry p2bc (std pba2, #25) but one glide is better than the other. The methyl ends of the two ethyls in a dimer are up/down (breaking the pseudo 2) except in #7&8. Layers separated by a/2 are related by the a glide. PLATON finds a local 1-bar at 0.01, 0…	LUMYAT
8	SR	MAJSOG	9	(0 0 !)	4	2	c glide	A/ 1,2,3,4,5,6,7,8 (-0.3<z<0.3)	A,A',A,...	flat	[1 1 0]/4, [1 -1 0]/2 for layer at z=0 (0 0 1)	0.06	-0.3 < z < 0.3	p112/n (#7)	c	(near 0.0)	ca 90° rotation between layers	0-D	[1 1 0]/2 for layer at z=0; [1 -1 0]/2 at z=1/2	pseudotranslation [1 1 0]/4 at z=0 and [1 -1 0]/4 at z=1/2	Layers (0 0 1) contain all 8 molecules, which form dimers with NH...S= interactions. Adjacent layers (ie, z=0 , 1/2), related by the c glide, have molecular planes approximately perpendicular. The layers have approximate symmetry p112/n, #7) with axes [1 1 0]/4 and [1 -1 0]/2 (angle 90.06°) at z=0 and [1 1 0]/2 and [1 -1 0]/4 at z=1/2. In addition to being rotated the layers are slightly offset (…	MAJSOG
10	SR	MOTNUF03	4	(0 1 0)	10	5	2(1)	A/ 9,10 B/ 1,2 C/ 3,4 D/ 5,6 E/ 7,8	A,B,C,D,E, A',B',C',D', E',A,..	corrugated	a, c (0 1 0)	0.11	well separated	pb11 (#12)	b	(near 0.0)	(large)	1-D		slab of layers B,C,D,E has quite approx sym p2(1)/b11 (#17)	Layers (0 1 0) of H-bonded chains (#9,10; 2,1; 3,4; 5,6; 7,8; 9',10''; ...) spaced by b/10 with approx sym pc11 (std pb11, #12). Along b the direction of -OH…N(ar) bonds varies: + + - + - + + - + - etc. Good 1-bar sites and 2(1) axes in the 4-layer slab #2,1; #3,4; #5,6; #7,8; slab sym is p2(1)/c11 (std p2(1)/b11, #17). The layer #9,10, in which the molecular orientation is a little different (bu…	MOTNUF03
8	SR	MUMHAE	2	(0 0 1)	2	2	(NA)	A/ 5,6,7,8, 5',6',7',8' B/ 1,2,3,4. 1',2',3',4'	A,B,A,…	flat	a, b (0 0 1)	0.9	-0.3 < z < 0.3; 0.3 < z < 0.8	p12(1)/a1 at z=0, p2(1)/b11 at z=1/2 (both #17)	c	0.02, 0.02	0.23, 0.24	0-D	a/2 in A, b/2 in B		Molecules all the same except for 3- vs 5- Me on (rotatable) phenyl ring; ca 60/40 disorder in Me groups of #2 and 5. Dimers have approximate 1-bar symmetry. Layers (0 0 1) at z=0 (#5-8) and z=1/2 (#1-4) are approximately related by a 4(2) around c*, but the 4(2)relates adjacent layers only because alpha, beta = 81.5, and 82.2°. Pseudotranslation (a/2 for layer A; b/2 for layer B) and 1-bar sites…	MUMHAE
8	SR	QQQBVP02	2	(0 0 1)	4	2	1-bar	A/ 5,6,7,8 B/ 1,2,3,4	A,B,B',A', A,…	flat	a, b (0 0 1)	0.14	well separated	p1a1 at z=0.126; pb11 at z=0.374, both (#12)	c	(near 0.0)	(large)		b/2 at z=0.126; a/2 at z=0.374	layer axes 9.85, 9.88 Å; layers are related by an approx local fourfold screw along c	Diphenylamine. No NH…N short contacts, In each layer one of the phenyl rings has two different orientations. Layers A and B' are related by a 90° rotation but there is no indication of approximate tetragonal symmetry. There is a pseudotranslations of a/2 in one layer and of b/2 in the other.	QQQBVP02
12	SR	RUKTOI	1	(0 1 0)	2	2	(NA)	A/ 7,8,9,10,11,12 B/ 1,2,3,4,5,6	A,B,A,…	inter-digitating	[2 0 1]/3, [4 0 -1]/3 or [2 0 -1]/3, [4 0 1]/3 (0 1 0)	1.1	-0.1 < y < 0.6; 0.4 < y < 1.1	c211 (#10)		-0.02	(ca 70° rotation)	2-D	[1 0 -1]/3 in A; [1 0 1]/3 in B	the 12 H2O molecules are part of the H-bond pattern; the eight benzenes fill holes between layers	The layer of molecules 1-6 is rotated by 70° relative to the layer of molecules 7-12. The approximate (but very good) twofold axes are along [2 0 -1] for the layer of molecules 1-6 and along [2 0 1] for the layer of molecules 7-12.	RUKTOI
7	SR	SABPOB	19	(1 0 0)	2	1	2(1)s ∥ and ⊥ to layer normal	A/ 1,2,3,4,5,6,7, 1',2',3',4',5',6',7' (-0.3<x<0.3)	A,A',A….	flat	c/7, b (1 0 0)	0	0.2 < x < 0.8	pb2(1)m (#29) [1/7th of 2(1)s exact]	a	0	(large)	1-D	(c/7 for whole structure)	approximate group would be pb2(1)a (#33) if Z' were even and the 2(1), glide alternation were perfect	Layers (1 0 0) with four different H-bonded chains (#3,2, #1,5, #6,7, #4,4') along b. pseudotranslation c/7 but molecules differ in conformation (inversion of morpholine ring, rotation of -C(CN)=N-OH group) as well as orientation [direction of tip relative to (1 0 0)]. If the layer were planar (except for the morpholine ring) the approximate space group would be pm2(1)b (std pb2(1)m, #29) for a c…	SABPOB
8	SR	UMAHAT	1	(0 0 1)	4	4	(NA)	A/ 1,3 B/ 7,2 C/ 4,6 D/ 5,8	A,B,C,D,A,…	flat	a, b (0 0 1)	0.02	0.0<z<0.3; 0.3<z<0.5; 0.5<z<0.8; 0.8<z<1.0	p12(1)1 & p2(1)11 (both #9) alternate	c	0	(large)	1-D		a, b = 9.18, 9.22 Å and alpha, beta = 97.1, 96.8°; angle {1 1 2], c* is 0.34 deg.	With increased tolerances PLATON suggests (90% level) that the space group should be I2 with axes -b, a, and [1 1 2] angles 89.7, 90.0, and 90.0°) but a twofold axis would require 50/50 disorder in one of the four independent layers. The structure is, however, distorted P2(1) (#4). The layers can be overlaid well by translation if adjacent layers are related by local 4(1) axes, but the positions …	UMAHAT
5	SR	WOPVOO	14	(0 0 1)	2	1	2(1), c glide	A/ 1,2,3,4,5, 1',2',3',4',5' (-0.2<z<0.3)	A,A',A,…	flat	a, [1 2 0]/5 (and a, [1 -2 0]/5) (0 0 1)	(NA)	(separated by solvent)	p1-bar (#2) (20% of 1-bars exact)	c	(NA)	(NA)	1-D	[1 2 0]/5 in layer at z=0; [1 -2 0]/5 at z=1/2	layers separated by regions of solvent (DMSO, H2O); pseudotrans [1 2 0]/5 at z=0, [1 -2 0]/5 at z=1/2	Chains of H bonded 3,4-bis(amino)cyclobut-3-ene-1,2-dione rings; 4-hydroxylphenyl substituents at end make H bonds to included DMSO, H2O, which link layers (0 0 1) (symmetry p1-bar, #2, with a 5-fold modulation). Layers are related by the c glide; modulation is along [1 2 0] at z=0 and along [1 -2 0] at z=1/2; the angle between the two directions is 50.6°. Ordered, H-bonding solvents (4 DMSO, 2 w…	WOPVOO
6	SR	XAXTUL	2	(1 0 0)	4	2	1-bar	A/ 4,5,6 B/ 1,2,3	A,B,B',A', A,…	flat	b, c (1 0 0)	-0.04	well separated	p6-bar (#74)		0	(molecu-lar orien-tations differ by ca 60°)			layer axes 14.13, 14.13 Å	4,6-Dichloro-2-(methylthio)pyrimidine. The two individual layers have very good p6-bar symmetry that is broken by the stacking. The two layers can be superposed by translation if one of them is rotated. If a column of molecules along a is considerd, the approximate rotations around a* relating molecules in the column are 60,60,180,60,60,60,180,60°,... The molecules in a column are also somewhat o…	XAXTUL
12	SR	ZZZVXQ02	144	(0 0 1)	12	4	3(1)	A1/ 10,11,12 B1/ 7,8,9 A2/ 4,5,6 B2/ 1,2,3	A1,B1,A2, B2,A1',B1', A2',B2',A1", B1",A2", B2",…	flat	a, b (0 0 1)	0	well separated	p6-bar (#74)	c	(near 0.0)	(large)	0-D?		layers A and B related by approximate inversion (or twofold rotation around c*)	One of five polymorphs of picryl bromide (Z' = 3, 6, 12, 12, and 18), which seems to form trimers having Br...O(nitro) interactions. The asymmetric unit has layer stacking A1,B1,A2,B2, where the A and B layers are related by approximate inversion (or an approximate twofold axis around c* since the layer is nearly planar). Layers A1 and A2 can be superimposed by translation, as can layers B1 and B…	ZZZVXQ02
6	SR	ZZZVXQ03	2	(0 0 1)	4	2	1-bar	A/ 4,5,6 B/ 1,2,3	A,B,B',A', A,...	flat	a, b (0 0 1)	0.22	well separated	p6-bar (#74)	c	(near 0.0)	(large)	0-D?		layer axes 14.85 14.86 Å; layer A2 related to A1 by approx inversion (or twofold rotation around c*)	One of five polymorphs of picryl bromide (Z' = 3, 6, 12, 12, and 18), which seems to form trimers having Br...O(nitro) interactions. The asymmetric unit has layer stacking A,B,B',A',A,... where the A and B layers are related by an approximate inversion center (or an approximate twofold axis around c* since the layer is nearly planar). The angles alpha and beta are 72.8 and 80.4° so there is no ap…	ZZZVXQ03
12	SR	ZZZVXQ05	2	(0 0 1)	8	4	1-bar	A1/ 1,2,3 B1/ 4,5,6 A2/ 7,8,9 B2/ 10,11,12	A1,B1,A2, B2,B2',A2', B1',A1',A1,...	flat	a, b (0 0 1)	0.1	well separated	p6-bar (#74)	c	(near 0.0)	(large)	0-D?		layer axes 14.92. 14.94 Å; layers A, B related by approx inversion (or twofold rotation around c*)	One of five polymorphs of picryl bromide (Z' = 3, 6, 12, 12, and 18), which seems to form trimers having Br...O(nitro) interactions. The asymmetric unit has layer stacking A1,B1,A2,B2, where the A and B layers are related by approximate inversion (or an approximate twofold axis around c* since the layer is nearly planar). Layers A1 and A2 can be superimposed by translation, as can layers B1 and B…	ZZZVXQ05
18	SR	ZZZVXQ06	1	(0 0 1)	6	6	(NA)	A1/ 1,2,3 B1/ 4,5,6 A2/ 7,8,9 B2/ 10,11,12 A3/ 13,14,15 B3/ 16,17,18	A1,B1,A2, B2.A3.B3, A1,…	flat	a, b (0 0 1)	0.1	well separated	p6-bar (#74)	c	(near 0.0)	(large)	0-D?		layer axes 14.91. 14.91 Å; layers A, B related by approx inversion (or twofold rotation around c*)	One of five polymorphs of picryl bromide (Z' = 3, 6, 12, 12, and 18), which seems to form trimers having Br...O(nitro) interactions. The asymmetric unit has layer stacking A1,B1,A2,B2,A3,B3 where the A and B layers are related by approximate inversion (or an approximate twofold axis around c* since the layer is nearly planar). Layers A1m A2m A3 can be superimposed by translation, as can layers B1…	ZZZVXQ06
49	49	49	49	49	49	49	49	49	49	49	49	49	49	49	39	49	49	33	18	38	49
