# Supplementary material for: Pseudosymmetric layers in high-Z′ and P1 structures of organic molecules
Source: Royal Society of Chemistry journal article supplement (doi:10.1039/d0ce00302f), 2020-01-01
Supplement: d0ce00302f4.xlsx [file d0ce00302f4.xlsx]

## Sheet: All
Type	Refcode	Year	T	R	Z (2*Z if in CSD as a cmpd)	deltas (90, angle)	Rmsd(s) for overlay, Å	Rmsd(s) for overlay with inversion, Å	Rmsd(s) for overlay with flexibility, Å	Rmsd(s) for overlay with inversion and flexibility, Å	# stereo-centers	# stereo-centers that differ	Layer axes; layer hkl	|in-plane angle - ideal value|, deg	Layer bounds, fract coords	Approx layer symmetry (z'=1 unless specified)	3rd axis; # layers included	# indepen-dent layers	In-layer offset, Å	Out-of-layer offset(s), Å	Abs(angle of special axis with 3rd axis - 90), °	Angle of 3rd axis with layer normal, °	Pseudo-translation (P1 axes); avg_rmsd	PLATON rec	Intermol H bonds?	n-D; axis	Comments	Refcode
S	ABONEM	2011	173	0.0416	4	-11.0 -9.2 -0.3	0.02, 0.07, 2.66-2.68 (4x)	(NA), 2.31-2.32	(NA), 1.84-2.25	(NA), 1.33-1.36	4	0 (2x), 1 (4x)	a, b; (0 0 1)	0.3	0.2 < z < 1.2	p2(1)/b11 (#17)	c; 1	1	0.01	0.37	9.2			81% P-1, Z'=2	(no donor)		Pair of diastereomers that differ at P atom; #1&2 and #3&4 are homochiral and related by an approx 2(1) axis. The approx glide relates #1&4 as well as #2&3. Approximate inversion centers relate #1&3 as well as #2&4.	ABONEM
S	AVEJES	2016	RT	0.0425	2	-5.9 -0.7 -0.2	0.32		0.08		2	0	b, a; (0 0 1)	0.2	-0.3 < z < 0.7	p2(1)11 (#9)	c; 1	1	0.00	0.2	5.9			none	none		There are intramolecular NH…O= bonds.	AVEJES
S	AVOJEC	2016	93	0.0402	2	19.3 8.8 0.9	0.41		0.069		1	0	b, a; (0 0 1)	0.9	0.0 < z < 1.0	p2(1)11 (#9)	c: 1	1	0.01	0.39	19.3			none	(no donor)		Could also see the structure as a quite distorted C2 (#5) structure with axes (relative to the P1 cell) a, b, and (0 1 2] but the angle of [0 1 2] with b is 84.6°.	AVOJEC
S	AXETED	2011	100	0.0304	4	-24.8 -13.5 -0.7	0.25-0.61		0.13-0.35		4	0	a, b (0 0 1)	0.7	0.0 < z < 1.2	p211 (#8), z'=2	c: 1	1	0.02	0.33	13.5			none	OH…O= OH…O	0-D (4-mer incl H2O)	Layers are not well separated but they are clearly offset. The one water molecule does not lie on the approximate twofold axis of the tetramer; might there be a second water? Molecule #3 has a different orientation of the cyclopentyl subsitutuent. The orientations of the two different pairs are clearly different.	AXETED
S	AXIBIT	2011	113	0.0377	4	-17.9 -0.7 -16.1	0.55, 0.61; 1.45-1.53 (4x)	(NA); 1.08-1.23	0.09-0.17		2	0	a, c (0 1 0)	0.7	0.1 < y < 1.3	p2(1)11 (#9), z'=2	c; 1	1	0.02	0.29	16.1			[100% P-1 if incr tol but disordrd, EP]	(no donor)		The layers are reasonably well separated but for interpenetrating nirro groups. The 2(1) axes are obvious. The approx 1-bar sites found by PLATON relate homochiral #1&4 as well as #2&3, so the layer group is quite approx p2(1)/b11 (#17) mimic, with the glide along c.	AXIBIT
S	BACNUP	2002	130	0.0371	2	-4.8 -7.6 -0.9	0.08				4	0	b, a; (0 0 1)	0.9	0.1 < z < 1.1	p2(1)11 (#9)	c; 1	1	0.01	0.19	4.8			none	(no donor)		Molecules have approximate twofold rotational symmetry but it is not used in the packing.	BACNUP
S	BEHFAW	2003	293	0.0461	2	-17.0 -7.3 -0.5	0.094				4	0	a, b (0 0 1)	0.5	0.0 < z < 1.0	p2(1)11 (#9)	c; 1	1	0.01	0.22	7.3			[84% Cm with incr tol but disordrd, EP]	none		The hydroxyl group makes no conventional H bonds.	BEHFAW
S	BEJMOS	1997	143	0.0321	2	-9.8 -3.3 -1.2	0.068				1	0	b, a; (0 0 1)	1.2	0.4 < z < 1.3	p2(1)11 (#9)	c; 1	1	0.02	0.26	9.8			none	(no donor)		A straightforward layered structure.	BEJMOS
S	BIHVUJ	1982	295	0.046	4	-26.4 -13.3 -14.6	0.30-0.56		0.16-0.28		2	0	a. [0 1 -1] (0 1 1)	0.2	(not calc)	p2(1)2(1)2 (#21)	[0 1 1]; 2	1	0	0.50 0.13	16.4 4.8			none	NH…O=	0-D (2-mer)	Straightforward layered structure but of higher approximate symmetry than most. The layers are stacked in a way that resembles centering but the offset per layer along a is 0.25 per layer.	BIHVUJ
S	BISREC	2013	293	0.046	4	-25.4 -10.3 -15.4	0.06, 0.12, 0.36-0.45 (4x)		(NA), 0.10-0.20 (4x)		2	0	a, [1 -2 0]; (0 0 1)	0.6	-0.1 < z < 0.9	c211 (#10), z'=2	c; 1	1	0.04	0.37	10.3			none	(no donor)		Z=4 for the triclinic cell; z=8 for the centered layer cell so that for that layer cell z'=2. The two independent molecules (#1&4 vs #2&3) have very different orientations	BISREC
S	BIVLIC	2007	100	0.0366	4	21.1 0.5 11.7	0.06-0.25		0.03-0.09		5	0	a, c; (0 1 0)	0.5	-0.1 < y < 1.0	p222 (#19)	b; 1	1	0.02, 0.00	0.39, 0.31	21.1 11.7			none	OH…O-	1-D; a	C17H27OH; H-bonded, fourfold helices along a that have rod symmetry p222 (#13). Corrugated layers (0 1 0) with approximate symmetry p222. Another (less good?) possibility is (0 0 1) with approximate symmetry c222, and axes a and [1 2 0]/2 (angle 93.28°).	BIVLIC
S	BIZMIJ	2019	298	0.0391	2	13.1 8.7 1.1	0.134				1	0	b, a; (0 0 1)	1.1	0.0 < z < 1.0	p2(1)11 (#9)	c; 1	1	0.02	0.25	13.1			[82% P-1 if incr tol but EP]	(no donor)		Straightforward layered structure.	BIZMIJ
S	BORFAR	2014	110	0.0495	2	10.0 7.0 0.6	0.088				2	0	b, a; (0 0 1)	0.6	-0.2 < z < 0.8	p2(1)11 (#9)	c; 1	1	0.01	0.26	10			none	NH…O=	1-D; a	Straightforward layered structure.	BORFAR
S	CEFKAA	2006	100	0.0452	2	-16.9 -0.3 -14.7	0.14		0.1		4	0	c, a; (0 1 0)	0.3	-0.1 < y < 0.9	p2(1)11 (#9)	c; 1	1	0.00	0.25	16.9			[88% P-1 if incr tol but EP]	(no donor)		Uncomplicated structure in which layers have higher approximate symmetry than does the structure as a whole. Layers (1 -1 0) are more obvious and include the 2(1) axes but there is no simple translation perpendicular to those axes.	CEFKAA
S	CEHYEW	2017	173	0.0453	4	-1.1 -8.1 -1.3	0.09, 0.11 (2x) 2.01-2.08(4x)	(NA), 0.07-0.10 (4x)			1	0 (2x); 1 (4x)	a, b; (0 0 1)	1.3	0.1 < z < 0.6; 0.6 < z < 1.1	pb11 (#12), z'=2	c; 1	2	0.03	0.26	8.1			none	(no donor)		Kryptoracemate. In one "half" layer (0 0 1) #1&3 are related by approx b/2 glides (mirror perp to a); in the other "half" #2&4 are related in the same way. The two "half" layers are not related in any simple way because of the way the enantiomers alternate.	CEHYEW
S	CEMZAX	2013	15	0.0447	2	-18.4 -0.3 -20.0	0.913		0.366		6	0	a, [0 1 -1]; (0 1 1)	(not special)	(not calc)	p112 (#3)	[0 1 1]; 2	1	(NA)	0.22 0.26		13.5		none	(no donor)		Large, fused-ring molecule; major difference is in rotations of -Ph-OMe and -C(=O)OMe substituents. Pairs of molecules are related by approximate twofold axes perpendicular to the layers (0 1 1). The is no approximate 3-D symmetry.	CEMZAX
S	CEPYAY	2006	143	0.0362	2	-10.0 -3.2 -1.4	0.396		0.15		1	0	b, a; (0 0 1)	1.4	0.4 < z < 1.3	p2(1)11 (#9)	c; 1	1	0.02	0.27	10			83% P-1 with incr tol but EP	(no donor)		Straightforward layered structure.	CEPYAY
S	CEWDUG	2018	150	0.0465	2	-20.7 -0.6 -18.2	0.103		0.074		9	0	c, a; (0 1 0)	0.6	0.0 < y < 1.0	p2(1)11 (#9)	b; 1	1	0.01	0.28	20.7			[91% P-1 with incr tol but EP]	none		(There is an intramolecular OH…O= bond.)	CEWDUG
S	CEWMAT	2006	RT	0.0436	2	-20.8 -0.4 -11.3	0.03				3	0	c, a; (0 1 0)	0.4	-0.3 < y < 0.6	p2(1)11 (#9)	b; 1	1	0.00	0.32	20.8			none	OH…O=	1-D; c	Straightforward layered structure.	CEWMAT
S	COCYEZ	1999	291	0.0386	2	-9.6 -11.4 -0.9	0.08				2	0	b, a; (0 0 1)	0.9	0.4 < z < 1.4	p2(1)11 (#9)	c; 1	1	0.01	0.23	9.6			[83% P-1 with incr tol but disordrd, EP]	NH…O=	2-D; a, b	Straightforward layered structure.	COCYEZ
S	CUKDAN10	1985	RT	0.04	2	3.2 -9.7 12.9	1.89	0.065	1.195		2	2	[1 -1 0], c; (0 1 0)	(not special)	-0.1 < y < 0.8	p11a (#5)	b; 1	1	(NA)	0.67 0.12	51.0 3.2	9.8		none	(no donor)		Kryptoracemate. Straightforward layered structure.	CUKDAN10
S	DAMLOV	2016	100	0.0315	2	5.3 6.9 1.3	0.273		0.171		3	0	a, b (0 0 1)	1.3	0.0 < z < 1.0	p2(1)11 (#9)	c; 1	1	0.03	0.16	6.9			none	(no donor)		Straightforward example of a layered structure.	DAMLOV
S	DOVXIW	2009	105	0.0384	4	0.1 3.1 19.9	0.15-0.41		0.12-0.41		4	0	c, b; (1 0 0)	0.1	0.3 < x < 1.4	p2(1)22 (#20), z'=2(1/2)=1	a; 1	1	0.00	0.34 0.03	3.1			[90% P-1 if incr tol but EP]	NH…O= O(W)…O= NH…O(W)	1-D; b	Cyclic molecule; two urea and two amide linkages. In molecular columns along b (#3&4 and #1&2) tight dimers are linked by two included water molecules. Molecules have approximate symmetry 2.	DOVXIW
S	DUNHAW	2010	296	0.039	2	-18.3 -10.9 -16.5	0.066		0.062		1	0	a, [0 1 -1]; (0 1 1)	0.24	(not calc)	p2(1)11 (#9)	b; 1	1	0.01	0.32	16.5			[86% P-1 with incr tol but EP]	(no donor)		Very simple structure that is a classic example of a layered structure.	DUNHAW
S	ECARUV	2001	291	0.0378	2	-17.6 -20.3 -0.9	0.196		0.112		2	0	b, a (0 0 1)	0.9	-0.3 < z < 0.7	p2(1)11 (#9)	c; 1	1	0.01	0.3	18.6			none	(no donor)		Very obvious rods along b. They are about equally well separated along a and c but the angle in a layer (1 0 0) would be far from 90° and would not have any approximate centering either.	ECARUV
S	EYUJOZ	2016	100	0.0464	2	-13.2 -19.0 -0.6	0.259	0.113			4	0	b, a; (0 0 1)	0.6	0.0 < z < 1.0	p2(1)11 (#9)	c; 1	1	0.01	0.26	13.2			none	OH…O	1-D; b	Straightforward layered structure.	EYUJOZ
S	FABDIY	2015	93	0.0344	2	-18.3 -0.2 -12.3	0.06				0	(NA)	a, c; (0 1 0)	0.2	-0.1 < y < 1.2	p2(1)11 (#9)	b; 1	1	0.01	0.27	12.3			none	none		Adjacent layers, which are corrugated, interpenetrate but the 2(1) axes are very exact, and the offset between layers is very significant. Planes (0 1 1) are more obvious but there is no simple translation approximately perpendicular to a.	FABDIY
S	FABWUD	2015	296	0.0438	2	10.5 3.7 1.2	0.603	0.057	0.106		0	(NA)	a, [1 -1 0]; (0 0 1)	(not special)	0.1 < z < 1.0	p11a (#5)	c; 1	1	(NA)	0.20 0.25	3.7 8.5	11.2		none	(no donor)		6-Bromo-2-(4-chlorophenyl)-3-iodonaphthalene. The Br and I atoms are at the surfaces of the layers but do not seem to interact with each other. There are interlayer I…H interactions < sumVDW but not < sumVDW - 0.1 Å.	FABWUD
S	FIVPOR	2014	150	0.0316	2	-5.3 -6.8 -15.5	0.941	0.661	0.88	0.268	1	1	a, b; (0 0 1)	(not special)	0.5 < z < 1.5	p11a (#5)	c; 1	1	(NA)	0.28 0.15	5.3 6.8	7.8		none	(no donor)		Kryptoracemate. The layers are not especially well separated and while the glide relationship is obvious it is less good than many. But there seems to be no better description for this structure.	FIVPOR
S	FONXIQ	2009	294	0.039	2	-26.1 -12.1 -22.1	0.226		0.1		4	0	a, [1 -2 0]; (0 0 1)	0.2	0.3 < z < 1.4	c211 (#10)	c; 1	1	0.01	0.31	12.1			[96% P-1 with incr tol but EP]	OH…O= NH…O	2-D; a, b	Straightforward example of a layered structure with approximate centering.	FONXIQ
S	FUZTIE	2010	298	0.0429	2	10.4 0.8 18.0	0.763		0.08		3	0	[1 -1 0], [1 1 0] (0 0 1)	0.1	0.2 < z < 1.1	c211 (#10)	c; 1	1	0.00	0.11	5.9			[82% P-1 with incr tol but EP]	OH…O= OH…O	2-D; a, b	(Conformations differ by a 180° rotation of the COOH group.) Transformation (1 -1 0 } 1 1 0 | 0 0 1) gives C-centered cell with angles 99.6, 84.1, and 90.1°. The layer offset is smaller than usual but obvious; a description of layers is better than of pseudosymmetry.	FUZTIE
S	GABYIT	2010	RT	0.0317	2	9.6 10.7 0.3	0.08				6	0	b, a; (0 0 1)	0.3	-0.3 < z < 0.7	p2(1)11 (#9)	b; 1	1	0.00	0.28	9.6			none	OH…O= OH…O	2-D; a,b	Straightforward layered structure.	GABYIT
S	GEHWIA	2006	130	0.0357	2	-13.6 -1.3 -7.9	0.05; 0.06				6; 1	0; 0	[1 -1 0], [1 1 0]; (0 0 1)	0.9	0.4 < z < 1.3	c211 (#10)	c; 1	1	0.02	0.22	9.4			[89% P-1 with incr tol but EP]	NH(+)H.O(=/-) OH.O=, OH.O N(+)H…O	3-D	Brucinium hydrogen L-malate pentahydrate. Ion layers that have obvious (if approximate) c211 symmetry are linked by H-bonds through layers of the ten water molecules.	GEHWIA
S	GERNEX	2006	293	0.043	2	-26.1 -15.0 -11.5	1.138		0.092		5	0	[1 -1 0], [1 1 0]; (0 0 1)	3.6	-0.3 < z < 0.7	c211 (#10)	c; 1	1	0.08	0.14	9.3			[81% P-1 with incr tol but EP]	OH…O= OH…O	2-D; a, b	The layers interpenetrate some but include the 2-D H-bond network and are visually obvious. The angle in the layer deviates from 90° more than usual but the approx sym is easy to see. The included water molecule lies on the approx twofold rotation axis.	GERNEX
S	GESXOU	2017	150	0.0289	2	-10.3 -0.7 -20.6	0.048				2	0	[1 -1 0], [1 1 0] (0 0 1)	0.1	0.4 < z < 1.3	c211 (#10)	c; 1	1	0.00	0.23	8.4			none	(no donor)		Good example of a layered structure in which the layer has approximate c211 symmetry.	GESXOU
S	GOCQAT	2018	100	0.0258	2	-11.4 -8.5 -0.1	0.011				1	0	b, a (0 0 1)	0.1	-0.5 < z < 0.5	p2(1)11 (#9)	c; 1	1	0	0.25	11.4			none	none?		Straightforward layered structure. There are possible NH donors and S=O acceptors but the N…O distances are longer than sumVDW + 0.2 Å. If there are NH…O= bonds they link molecules related by translation along a (ie, within the layers).	GOCQAT
S	GOKNUR	2011	90	0.0281	2	-12.7 -0.8 -29.0	0.251		0.115		4	0	[1 -1 0], [1 1 0] (0 0 1)	1.7	-0.2 < z < 1.0	c211 (#10)	c; 1	1	0.05	0.26	11.9			none	OH…O	1-D; [1 -1 0]	The H-bonded chains include one water molecule. The carobonyl groups and its attached O from adjacent layers interpenetrate but the approximate symmetry in the layer is obvious. Layers consist of H-bonded chains.	GOKNUR
S	GURBIG	2014	100	0.0305	2	-3.5 -6.9 -0.5	0.06				5	0	b, a; (0 0 1)	0.5	-0.5 < z < 0.5	p2(1)11 (#9)	c; 1	1	0.01	0.15	3.5			none (finds local 1-bar but EP)	(no donor)		Steroid derivative; the ring systems stack in the layers (near z=0). The layer offset is modest (0.15) but the spacing for the 2(1) axes is clearly better at z=0.0 than at z=0.5. If pseudosymmetric rather than layered the group would be P2(1) (#4).	GURBIG
S	GUZVIG	2003	150	0.0462	2	11.1 8.4 0.0	0.026				0	(NA)	b, a; (0 0 1)	0	0.1 < z < 1.1	p2(1)11 (#9)	c; 1	1	0.00	0.25	11.1			[97% P-1 if incr tol]	none		P3N3 ring with two N(H)CMe3 substituents on each P atom; molecule has approximate 3/m symmetry with the threefolds approximately parallel to a. Layers (0 1 -1) are more closely packed than layers (0 0 1) but the former have no symmetry other than translation.	GUZVIG
S	HEGYEX	1994	RT	0.038	2	4.9 0.5 3.8	0.293		0.133		4	0	a, c; (0 1 0)	0.5	-0.1 < y < 1.0	p2(1)11 (#9)	b; 1	1	0.01	0.17	3.8			none	(no donor)		Straightforward layered structure although the layers are a little less well separated than usual.	HEGYEX
S	HIBGIL	2018	100	0.0358	2	10.4 10.3 0.1	0.615	0.058	0.108	0.037	0	(NA)	b, a; (0 0 1)	(not special, but 0.1)	0.4 < z < 1.3	p11a (#5)	c; 1	1	(NA)	0.22 0.23	10.4 10.3	14.7		none	NH…S=	0-D (2-mer)	The spacing within layers 0.4 < z < 1.3 is much better than between layers but there is one (and only one) long NH…S= bond between layers; one molecule is the donor and the other the acceptor.	HIBGIL
S	HUSWAT	2003	150	0.0494	4	9.8 5.5 0.8	0.15-1.19; 0.05-0.66		0.08-0.15; 0.01-0.07		2; 0	0; (NA)	[1 -1 0]/2, [3 3 2] (1 1 -3)	(not special)	(not calc)	p112 (#3)	a; 1	1	(NA)	0.19 0.06		68.9	[1 -1 0]/2; 1.32	93% P-1 but EP	OH…N	1-D; [3 3 2]	1:1 (1R,3S)-Camphoric acid 1,2-bis(4-pyridyl)ethane; 85:15 disorder of all all acids and of two of the four amines. Zigzag H-bonded chains [3 3 2] in layers (1 1 -3); disorder may be of layer orientation. In the p112 cell the bases would lie on 2-folds.	HUSWAT
S	IBIMEO	2017	103	0.0452	2	12.5 19.7 0.8	0.038				6	0	b, a; (0 0 1)	0.8	-0.2 < z < 0.7	p2(1)11 (#9)	c; 1	1	0.01	0.24	12.5			87% P-1 with incr tol but EP	OH…O	1-D; b	H-bonded bilayers. The spacing along the approximate 2(1) axis is quite uneven because of the spacings needed for the H bonds (two OH groups per molecule). The spacing for the 2(1) axis is much better between layer halves.	IBIMEO
S	IGARIT	2013	93	0.0452	4 (2 in CSD)	5.8 5.7 0.0	0.01, 0.10, 1.42 (4x)	(NA), 0.06-0.07	0.02-0.17		0	(NA)	b, a; (0 0 1)	0	-0.4 < z < 0.6	pb2n (#34)	c; 1	1	0	0.27	5.8 5.7		[1 1 0]/2; 1.69, 0.15, 0.55?	[100% I2, Z'=2 if incr tol but disordrd]	OH…O= OH…O	1-D; b	(In the CSD Z' is given as 2 for two molecules, two H2Os and one DMSO; Z'=4 seems a better description.) #2,3 are the conformational enantiomers of #1,4. All H bonds are within the layers. The glides seem a better description than the [1 1 0]/2 pseudo-translation.	IGARIT
S	INAGAH	2016	100	0.037	2	-20.6 -13.0 -12.9	0.198		0.07		1	0	a, [0 1 -1]; (0 1 1)	0.5	(not calc)	p2(1)11 (#9)	b; 1	1	0.01	0.24	12.9			[85% P-1 with incr tol but EP]	NH…O=	1-D; a	Layers (0 1 1) do interpenetrate but they are the only layers having obvious approximate symmetry.	INAGAH
S	ITUFIN	2011	RT	0.0443	2	-22.2 -13.4 -0.5	0.12				2	0	a, b; (0 0 1)	0.5	0.1 < z < 1.3	p2(1)11 (#9)	c; 1	1	0.01	0.27	13.4			none	(NH…O=)	0-D (to solv along a)	H bonds are to included DMSO molecules, which also are related by the approximate 2(1) axes. The layers are less well separated than usual but the 2(1) axes are very obvious and the offset between adjacent layers is large.	ITUFIN
S	IYIXEU	2011	150	0.0441	2	17.9 0.1 4.0	0.11				8	0	c, a; (0 1 0)	0.1	-0.1 < y < 0.9	p2(1)11 (#9)	b; 1	1	0.00	0.27	17.9			none	OH,,,N- OH…O	2-D; b, c	A sesquihydrate; layers are separated by water molecules that are H-bonded to the C24H28N2O5 molecules and to each other. Each of the large molecules makes one H bond to the next layer	IYIXEU
S	JAVKOG	1998	RT	0.044	2	0.7 7.5 0.2	0.082				5	0	a, b; (0 0 1)	0.2	0.1 < z < 1.1	p2(1)11 (#9)	c; 1	1	0.00	0.24	7.5			none	(no donor)		Each "layer" is composed of two half-layers containing molecules related by translation. The approximate 2(1) axes are at z=0.602 even though the half-layers are somewhat closer together near z=0.102.	JAVKOG
S	JAZHAU	2005	173	0.0302	4	-4.8 -7.7 -0.6	0.06-0.28		0.05-0.21		2	0	a, b; (0 0 1)	0.6	0.0 < z < 1.0	p2(1)11 (#9), z'=2	c; 1	1	0.01	0.23	8.7			none	N(+)H…O=	1-D; (2-mers)	Approximate 2(1) along a that relates 1&4 as well as #2&3. The two sets of molecules are not related in any simple way. The included CH2CL2 molecules are also related by the approximate 2(1) axes but there is some disorder.	JAZHAU
S	KEGTEW	2006	295	0.0448	2	-0.9 -16.1 -28.1	0.344		0.096		4	0	c, b; (1 0 0)	0.9	-0.6 < x < 0.6	p2(1)11 (#9)	a; 1	1	0.01	0.17	16.1			[83% P-1 with incr tol but disordrd, EP]	(no donor)		Rods along c with very good 2(1) axes form a rectangular centered array (angle of a and [1 -2 0] is 89.7°) but there is no overall pseudosymmetry.	KEGTEW
S	KOPVEQ	2000	RT	0.048	2	13.3 9.8 -0.2	0.09				1	0	b, a; (0 0 1)	0.2	-0.5 < z < 0.5	p2(1)11 (#9)	c; 1	1	0.00	0.24	13.3			none	OH…O=	1-D; b	Straightforward layered structure.	KOPVEQ
S	KOQNOV	2014	87	0.0389	2	-15.3 -0.9 -5.9	0.044				7	0	a, c; (0 1 0)	0.9	-0.1 < y < 0.8	p2(1)11 (#9)	b; 1	1	0.02	0.15	5.9			[80% P-1 with incr tol but EP]	(no donor)		Layers (0 0 1) are also possible but less pseudosymmetric.	KOQNOV
S	KOVBIG	1992	123	0.047	4	8.3 6.7 0.0	0.02. 0.03, 0.81-0.84 (4x)	(NA), 0.03-0.04 (4x)			1	0 (2x), 1 (4x)	a, b; (0 0 1)	0	0.6 < z < 1.5	pb11 (#12), z'=2	c; 1	1	0	0.23	6.7			[80% P-1 with incr tol]	OH…O	1-D; b	Kryptoracemate; monoalcohol CnHmOH. #1&4 are homochiral as are #2&3. In the bilayers (0 0 1) containing H-bonded chains #1&2 are related by an approx glide as are #3&4. Then z'=2 for the layer because there is a not-simple offset between #1&3 and between #2&4.	KOVBIG
S	KUSVEZ03	2013	295	0.0421	2	10.8 12.3 0.4	0.656	0.02	0.02	0.017	0	(NA)	b, a; (0 0 1)	0.4	0.0 < z < 0.9	pb11 (#12)	c; 1	1	0	0.22	10.8		[1 1 0]/2; 0.92 (???)	[100% P-1 if incr tol but disorderd	NH…O=	2-D; a, b	Second polymorph of p-Toluenesulfonamide. The relationship between the two molecules is more like an a glide perpendicular to b than like a pseudotranslation. The glide works for layers (0 0 1); gamma=90.4.	KUSVEZ03
S	LAFHEH	2009	120	0.048	2	15.2 9.7 0.5	0.031				0	(NA)	b, a; (0 0 1)	0.5	0.0 < z < 1.0	p2(1)11 (#9)	c; 1	1	0.00	0.27	15.2			[81% P-1 with incr tol but disordrd]	(no donor)		Straightforward layered structure.	LAFHEH
S	LEFPAO	2006	RT	0.0494	2	-9.9 -4.0 -0.1	0.04				1	0	b, a; (0 0 1)	0.1	0.3 < z < 1.3	p2(1)11 (#9)	c; 1	1	0.00	0.25	9.9			none	NH…O=	1-D; a	Within layer the spacing along b for the approximate 2(1) axis is 0.50/0.50; between layers it is 0.25/0.75.	LEFPAO
S	LIJLEY	2018	273	0.047	4	-5.7 -11.6 -1.1	0.27-1.02		0.07-0.52		5	0	a, b; (0 0 1)	1.1	0.0 < z < 1.0	p2(1)11 (#9), z'=2	c; 1	1	0.02	0.32	11.6			none	(no donor)		The layers contain two unrelated molecular orientations.	LIJLEY
S	MEFJIS	2012	173	0.0482	2	12.7 23.2 0.0	0.119				0	(NA)	b, a; (0 0 1)	0	-0.6 < z < 0.4	p2(1)11 (#9)	c; 1	1	0.00	0.26	12.7			[89% P-1 if incr tol but disordered	(no donor)		Molecule has an approximate mirror but its orientation is not special. One included molecule of ethyl acetate lies between the layers (0 0 1).	MEFJIS
S	MEGGUC	2012	173	0.0299	2	14.5 0.1 0.2	0.08				2	0	c, a; (0 1 0)	0.1	-0.3 < y < 0.8	p2(1)11 (#9)	b; 1	1	0.00	0.25	14.5			[81% P-1 if incr tol but disordered]	none		(There are -OH and O= groups but the contacts (along a) are longer than sumVDW+0.4Å)	MEGGUC
S	MIBGIO	2005	173	0.0446	2	7.6 20.1 0.8	2.551	0.199	2.303	0.15	3	3	b, a; (0 0 1)	(not special but 0.8)	0.2 < z < 1.2	p11a (#5)	c; 1	1	(NA)	0.17 0.44	7.6 20.1	21.7		none	NH…O=	1-D; b	Kryptoracemate. The H-bonded chains lie in the obvious layers.	MIBGIO
S	MILCOZ	2001	295	0.05	2	8.8 1.3 5.5	0.14		0.088		4	0	a, c; (0 1 0)	1.3	-0.1 < y < 1.0	p2(1)11 (#9)	b; 1	1	0.02	0.21	5.5			[100% P-1 with incr tol but EP]	(no donor)		Layers (0 1 1) are more obvious and better separated but they do not have 2-D approximate symmetry. There are approximate 2(1) axes along a but they only work well for every other set of molecules (ie, for #1/#2 but not for #2/#1).	MILCOZ
S	MUZHOG	2015	100	0.0402	4	10.4 3.0 0.2	0.03 (2x). 2.13-2.14 (4x)	(NA), 0.47-0.49 (4x)	(NA), 0.78-0.80 (4x)	(NA), 0.57-0.58 (4x)	2	0	a, b; (0 0 1)	0.2	0.3 < z < 1.3	pb11 (#12), z'=2 but EP	c; 1	1	0.01	0.09	3			none	OH…O=	1-D; b	Molecules #1,2 have the same conformation as do #3,4; the two conformations mimic a glide relationship. A bilayer -0.3 < z < 0.9 has more interpenetration but possibly more, but more approx, pseudosym (pb2(1)a, #33). Molecular overlay with inversion is better than overlay with flexibility because the latter does not allow inversion at the N atom.	MUZHOG
S	NEFGAG	1997	295	0.0282	2	-1.3 -3.6 -4.8	0.156		0.035		4	0	[0 1 -1], a; (0 1 1)	0.3	(not calc)	p2(1)11 (#9)	[0 1 1]; 2	1	0.00	0.2	11.6			none	NH…O=	1-D; [0 1 -1]	An approx C2 (#5) cell is not convincing: [0.5-0.398=0.102; (0.102)(12.67 )= 1.29 Å, which is large. Also,the 3rd axis in the C2 cell, [0 1 1], makes an angle of 101.6 with the unique axis [0 1 -1]. deviates from 90° by 11.6°.	NEFGAG
S	NEWCUQ	2018	293	0.0272	2	-9.3 -0.6 -6.6	0.825		0.092		9	0	c, a; (0 1 0)	0.6	0.4 < y < 1.5	p2(1)11 (#9)	b; 1	1	0.01	0.16	9.3			[84% P-1 with incr tol but EP]	(no donor)		Layered structure in which layers interpenetrate a little and the offset between layers is modest. Still, the approximate symmetry is better in 2-D than in 3-D.	NEWCUQ
S	NEXWIW	1997	295	0.046	2	11.6 1.3 27.8	0.101		0.069		5	0	[1 1 0], [1 -1 0]; (0 0 1)	0.9	-0.1 < z < 1.0	c211 (#10)	c; 1	1	0.03	0.27	12.6			none	OH…O=	0-D (thru H2O)	The two molecules are linked by H bond =O…HOH…O= within the layer (0 0 1). A view along [1 1 0] shows that that link is bent in a way that does not quite conform to the approximate twofold symmetry.	NEXWIW
S	NIBCAD	2007	163	0.0375	2	11.8 4.4 1.2	0.406		0.059		2	0	b, a; (0 0 1)	1.2	0.3 < z < 1.2	p2(1)11 (#9)	c; 1	1	0.01	0.24	11.8			none	(no donor)		Straightforward layered structure.	NIBCAD
S	NIFVAB	2013	173	0.0499	2	-12.3 -4.6 -4.7	0.665	0.439	0.354	0.145	0	(NA)	a, [0 1 -1]; (0 1 1)	0.1	(not calc)	pb11 (#12)	[0 1 1]; 2	1	0	0.2	3.1 6.0		[1 1 -1]/2; 0.79, 1.07 (glide?)	none	(no donor)		1:1 DMSO solvate. The pseudotranslation [1 1 -1]/2 is in the layer (0 1 1); the even more approximate layer symmetry is cm11 (#13) with axes a and [0 1 -1] with the molecules lying on a mirror and related by the glide. The pseudotranslation can then also be described as a pseudoglide. The included DMSOs also obey the glide quite well.	NIFVAB
S	NOMSUF	2014	100	0.0392	2	13.7 0.3 15.5	0.27		0.245		1	0	a, c; (0 1 0)	0.3	0.1 < y < 1.1	p2(1)11 (#9)	b; 1	1	0.01	0.27	15.5			[86% P-1 if incr tol but EP]	(no donor)		Three included toluene molecules: two are in the layers and are related by the approximate 2(1) axes while the third lies between the layers.	NOMSUF
S	OBARIV04	2014	RT	0.0461	4	-6.6 -4.6 -0.2	0.03, 0.06, 0.48-0.50 (4x)		(NA), 0.04-0.10		1	0	b, a; (0 0 1)	0.2	-0.2 < z < 0.8	p2(1)11 (#9), Z'=2	c; 1	1	0.00	0.23	6.6			[84% P-1, Z'=2 if incr tol but EP]	none		(No intermolecular H bonds.) Molecules #1,3 have the same conformation as do #2,4; #1&3 are related by the approximate 2(1) as are #2&4. #1&2, as well as #3&4, mimic an inversion relationship but the center would not be at the middle of the layer,	OBARIV04
S	OFEFOW	2013	293	0.0482	2	1.2 15.6 14.9	0.057		0.052		3	0	b, c; (1 0 0)	1.2	0.0 < x < 0.9	p2(1)11 (#9)	a; 1	1	0.02	0.25	14.9			[88% I2/m with incr tol but EP]	(no donor)		A layered structure. The most prominent features are columns along b. Layers (1 0 0) and (0 0 1) can be identified but (0 0 1) has no approximate symmetry in addition to the crystallographic translation symmetry.	OFEFOW
S	OGOSEK	2015	123	0.0322	2	-5.6 -8.3 -0.1	0.03				10	0	a, b; (0 0 1)	0.1	0.1 < z < 0.8	p2(1)11 (#9)	c; 1	1	0.00	0.19	8.3			[82% P-1 if incr tol but EP]	(no donor)		(The interlayer space is filled by H atoms.)	OGOSEK
S	PANFOA	2005	173	0.032	2	24.3 10.9 13.1	0.285		0.229		5	0	a, [1 2 2]; (0 1 -1)	0.5	(not calc)	c211 (#10)	c; 1	1	0.02	0.24	10.9			[81% P-1 with incr tol but EP]	OH…O	1-D; a	Good example of a layered structure with approximate c211 layer symmetry.	PANFOA
S	PEVGII	2012	93	0.028	2	-19.2 -23.5 -13.0	1.077		0.519		1	0	b, c; (1 0 0)	(not special)	0.4 < x < 1.4	p112 (#3)	a; 1	1	(NA)	0.22 0.37		24.2		none	(no donor)		(The two conformations differ by a ca 180° rotation of a C(=O)O(t-Bu) substituent.) Small rotational changes detract from the approximate twofold axes but they are still obvious.	PEVGII
S	PUJQIV	2010	293	0.0497	2	8.0 7.2 0.5	0.181	0.035	0.121		0	(NA)	b, a; (0 0 1)	0.5	0.0 < z < 0.9	pb11 (#12)	c; 1	1	0.01	0.27	8		[1 1 0]/2; 1.05 (???)	85% P-1	(no donor)		2-(Naphthalen-2-yl)azulene. The approximate glide in layers (0 0 1) seems a better description than the identified pseudotranslation. There is herringbone packing within the layers.	PUJQIV
S	QAHQOI	2012	100	0.048	2	18.5 10.4 14.8	0.824		0.247		2	0	b, [1 0 1] (1 0 -1)	(not special)	(not calc)	p112 (#3)	a; 1	1	(NA)	0.20 0.25		25.4		[85% P-1 with incr tol but EP]	OH…O	0-D (2-mer)	The dimer has approximate symmetry 222. There are layers (1 0 -1) with dimers 2s approximately parallel to the layer normal and F…F contacts at the layer-layer interface. Tranformation (0 1 0 | 1 0 1 | 1 0 0) gives angles 108.5, 100.4, and 104.8°.	QAHQOI
S	QAQLEA	2005	RT	0.05	2	-5.3 -9.9 -0.3	0.049		0.039		12	0	b, a; (0 0 1)	0.3	-0.1 < z < 0.8	p2(1)11 (#9)	c; 1	1	0.00	0.16	5.3			none	OH…O= OH…O-	2-D; a, b	Straightforward example of a layered structure.	QAQLEA
S	QEFRAX	2017	93	0.0406	2	-8.6 -1.1 -11.3	0.056				0	(NA)	c, a; (0 1 0)	1.1	-0.5 < y < 0.3	p2(1)11 (#9)	b; 1	1	0.01	0.13	8.6			[85% P-1 with incr tol]	(no donor)		Molecule has near mirror symmetry that is broken by the presence of one Me group. The molecule would lie on a special position (a mirror) of the approximate layer group pb2(1)m (#29) if the one Me group is ignored.	QEFRAX
S	QILGUP	2013	180	0.0303	2	-4.9 -5.2 -0.9	0.039				4	0	a, b; (0 0 1)	0.9	0.1 < z < 1.0	p2(1)11 (#9)	c; 1	1	0.02	0.18	5.2			[81% P-1 with incr tol but disordrd, EP]	(no donor)		Straightforward layered structure.	QILGUP
S	QODKOL	2014	120	0.0403	2	4.3 5.5 21.0	0.15; 0.05		0.15; 0.05		4; 0	0; (NA)	a, [1 3 1]; (0 1 -3)	(not special)	(not calc)	p112 (#3)	b; 1	1	(NA)	0.38 0.13		36.2	[1 1 1]/2; 1.84, 1.30	97% P-1 but EP	(no donor)		1:1:0.5 solvated co-crystal of an enantiopure TTF derivative with TCNQ; the solvent is THF. Layers (0 1 -3) have approximate twofolds normal to the layer that work less well for the THF molecules The pseudotranslation [1 1 1]/2 relates layers; the longer pseudotranslation [1 1 1]/2 + [0 1 0] = [1 3 1]/2 is in the layer but is a less good description for the TTF derivative than is the twofold.	QODKOL
S	QUBPIN	2009	283	0.0337	2	-8.1 -4.2 -3.5	0.332	0.033			0	(NA)	a, [0 2 -1]; (0 1 2)	0	(not calc)	pba2 (#25), z'=1/2	b; 1	1	0	0.08 0.31	37.4 3.5		[1 0 -1]/2; 1.28 (glide?)	none	OH…O	2-D; a, [0 2 -1]	2,2,3,3,4,4-Hexafluoro-1,5-pentanediol. Transformation (0 2 -1 | -1 0 0 | 0 0 1) gives angles 94.2, 124,6, 90.0°. Approximate glides in layers (0 1 2) are a better description than the pseudotranslation. Molecules lie on sites of approximate twofold symmetry. QUBPIN02 is below a subtle phase transition that does not affect the size or symmetry of the unit cell.	QUBPIN
S	RAMSED	2001	RT	0.0418	2	-15.6 -5.6 -11.4	2.838	0.105	2.869	0.083	2	2	c, a; (0 1 0)	(not special)	0.1 < y < 1.1	p11a (#5)	b; 1	1	(NA)	0.26 0.25	5.6 11.4	18.6		none	(none)		Kryptoracemate. Straightforward layered structure.	RAMSED
S	REJSUU	1996	RT	0.0468	2	-10.0 -7.5 -0.2	0.137		0.068		3	0	b, a; (0 0 1)	0.2	0.1 < z < 1.2	p2(1)11 (#9)	c; 1	1	0.00	0.23	10			none	OH…O=	1-D; a	Obvious layered structure although the layers are less well separated than many.	REJSUU
S	REPFOH03	1999	295	0.035	2	8.2 1.3 -9.5	0.065		0.054		2	0	a, c (0 1 0)	1.3	0.3 < y < 1.4	p2(1)11 (#9)	b; 1	1	0.02	0.25	9.5			[84% P-1 with incr tol but EP]	none		The two OH groups in each molecule form an intramolecular H bond.	REPFOH03
S	RUPVED	1997	295	0.0356	2	8.7 8.1 0.6	0.08; 0.03		0.02; 0.01		1; 1	0; 0	b, a; (0 0 1)	0.6	0.1 < z < 1.0	p2(1)11 (#9)	c; 1	1	0.01	0.25	8.7			[81% P-1 with incr tol but disordrd, EP]	OH…O NH…O	2-D; a, b	Straightforward layered structure.	RUPVED
S	SADZAZ	2004	298	0.04	2	14.8 14.2 0.9	0.069				5	0	a, b (0 0 1)	0.9	0.3 < z < 1.2	p2(1)11 (#9)	c; 1	1	0.02	0.34	14.2			[80% P-1 with incr tol but disordrd, EP]	(no donor)		Straightforward layered structure.	SADZAZ
S	SESBID	2013	123	0.042	2	-28.2 -10.2 -19.0	0.206		0.143		3	0	a, [1 -2 0]; (0 0 1)	3.1	-0.2 < z < 0.9	c211 (#10)	c; 1	1	0.13	0.24	10.2			[82% P-1 with incr tol but EP]	(no donor)		The approximate 2(1) screw axes along a are obvious. The best description seems to be layers (0 0 1) with axes a and [0 2 -1].	SESBID
S	SEZRIY	1990	198	0.0429	2	14.5 0.2 2.6	0.13				4	0	b, a; (0 0 1)	2.6	0.4 < z < 1.5	p2(1)11 (#9)	c; 1	1	0.04	0.35	14.5			[100% P-1 if incr tol but EP]	(no donor)		Straightforward layered structure. The distinction between an inversion and a screw relationship of somewhat subtle but not difficult to see.	SEZRIY
S	SIRKIO	2007	110	0.0458	2	-15.8 -0.2 -11.1	0.162		0.112		4	0	c, a; (0 1 0)	0.2	-0.3 < y < 0.8	p2(1)11 (#9)	b; 1	1	0.00	0.26	15.8			[89% P-1 if incr tol but EP]	(no donor)		The layers are not so well separated but the 2(1) axes are quite exact and the offset between adjacent layers along the 2(1) axis (0.26c) is quite large.	SIRKIO
S	TENPOU	2017	293	0.04	2	-13.8 -11.1 -22.2	0.126				hinderd rotation	0	a, [1 -2 0]; (0 0 1)	0.5	-0.1 < z < 1.1	c211 (#10)	c; 1	1	0.02	0.28	11.1			[83% P-1 with incr tol but EP]	(no donor)		The molecule has approximate symmetry 3. The layers interleave somewhat but are easily recognized. The approximate symmetry is striking.	TENPOU
S	TIKROV	2005	293	0.0474	2	1.6 11.0 0.7	0.583		0.143		4	0	a, b; (0 0 1)	0.7	0.2 < z < 1.4	p2(1)11 (#9)	c; 1	1	0.01	0.26	11			[90% P-1 with incr tol but disordrd, EP]	(no donor)		2,3,4- Tri-O-acetyl-b-D-xylopyranosyl isothiocyanate. Some penetration of OC(=O)Me groups. Orientation of NCS group varies some between the two molecules.	TIKROV
S	TUDKEK	2015	RT	0.0412	2 (like a 1:2 salt)	-7.4 -7.2 -0.0	0.03, 0.01-0.12				2; 2	0	b, a; (0 0 1)	0	-0.2 < z < 0.9	p2(1)11 (#9)	c; 1	1	0.00	0.28	7.4			none	N(+)H…O OH…O(-)	1-D; a	EP cation, EP anion (10-camphor sulfonate) plus an uncharged 10-camphor sulfonic acid molecule and a water molecule.	TUDKEK
S	TURYUC	2015	100	0.0262	2	7.4 6.2 0.3	0.07				8	0	b, a; (0 0 1)	0.3	-0.4 < z < 0.6	p2(1)11 (#9)	c; 1	1	0.00	0.28	7.4			none	N(+)H… CL(-)	1-D; a	HCl salt of a molecule containing a piperidine ring so the quaternary N atom is attached to two H atoms; there are then chains of N(+)H…CL(-) bonds. The 2(1) axes of the layers are quite exact.	TURYUC
S	TUXLIJ	2015	93	0.04	2	-17.6 -16.5 -26.2	0.07				(hinderd rot)	0	a, [1 -2 0]; (0 0 1)	1.5	-0.1 < z < 1.1	c211 (#10)	c; 1	1	0.05	0.35	16.5			none	OH…N(=)	1-D; a	The layers (0 0 1) are somewhat less well separated than the layers (0 1 0), for which -0.3 < y < 0.6. Layers (0 1 0) include the approximate twofold axis but the spacing along an approximate 2(1) axis is much less good. (There is no approximate F or I centering.)	TUXLIJ
S	UJADOZ	2009	93	0.044	2	-11.0 -0.4 -8.7	0.1				4	0	c, a; (0 1 0)	0.4	-0.2 < y < 0.9	p2(1)22 (#20), z'=1/2	b; 1	1	0.00	0.14	11			[87% P-1 if incr tol but EP]	(no donor)		The molecules, which could have fourfold symmetry, lie on twofold axes. The approximate layer symmetry also relates the two included benzene molecules.	UJADOZ
S	UKOBIG	2010	150	0.0394	2	0.2 -10.3 -19.2	0.047				2	0	[1 -1 0], [1 1 0] (0 0 1)	0.1	-0.6 < z < 0.3	c211 (#10)	c; 1	1	0.00	0.25	9			[82% P-1 if incr tol but EP]	(no donor)		Obvious layers (0 0 1), obvious axes 2 and 2(1) along [1 -1 0], obvious centering if layer axes are [1 1 0] and [1 -1 0]. Transformation (1 1 0 | 1 -1 0 | 0 0 1), det=2, gives cell with angles 99.0, 96.2, and 90.1°.	UKOBIG
S	ULUMUL	2016	100	0.04	2	-9.4 -1.8 -8.2	2.681	0.067	2.272		2 borane cages	2	[1 1 0], -a; (0 0 1)	(not special)	0.0 < z < 1.0	p11a (#5)	c; 1	1	(NA)	0.17	8.3 1.3	9.4		none	(no donor)		Kryptoracemate. Straightforward example of a layered structure.	ULUMUL
S	UMOWIE	2016	180	0.043	2	-18.8 -14.7 -13.5	0.106				2	0	a, [1 0 -2]; (0 1 0)	1	0.1 < y < 0.9	c211 (#10)	b; 1	1	0.06	0.36	13.5			none	(no donor)		The layers are unusually well separated.	UMOWIE
S	UNEVAK01	2007	RT	0.0407	2	9.1 1.0 0.3	0.188				5	0	b, a; (0 0 1)	0.3	-0.6 < z < 0.5	p2(1)11 (#9)	c; 1	1	0.00	0.29	9.1			none	(no donor)		Substituted sugar. The a and c axes are nearly perpendicular (beta=91.0°) but that has no significance since the 2(1) is along b and alpha=99.1°.	UNEVAK01
S	UNIBAW	2013	291	0.0474	2 (4 in CSD)	9.3 5.9 0.3	0.02, 0.03, 0.16-0.17 (4x)		(NA), 0.10-0.13 (4x)		2	0	a, b (0 0 1)	0.3	-0.1 < z <0.9	p2(1)11 (#9)	c; 1	1	0	0.22	5.9		[0 1 0]/2; 0.03 (ie, too good)	100% P1 but b'=b/2	NH…O=	1-D; b	Z should be reduced from 4 to 2 because the pseudotranslation is too good. In the reduced cell without the too-good pseudotranslation a and b would be switched. UNIBAW can also be seen as a quite distorted P2(1) structure with deviations from 90° of 0.3 and 5.9°.	UNIBAW
S	UTOCUD	2016	200	0.044	2	-16.0 -19.3 -22.8	0.393		0.337		3	0	[1 0 -1], b; (1 0 1)	0.4	(not calc)	p2(1)11 (#9)	a; 1	1	0	0.25	3.9			none	(no donor)		Straightforward example of a layered structure.	UTOCUD
S	UWALIP	2016	123	0.0344	4	7.3 8.7 5.6	0.27-1.44		0.13-0.61		3	0	[0 1 -1]/2, a; (0 1 1)	3.1	(not calc)	p2(1)11 (#9)	[0 1 1]; 2	1	0.04	0.19	12.5		[0 1 1]/2; 0.59	[96% P-1 with incr to but EP]	OH…O=	0-D (2-mers)	Layers (0 1 1) in which the pseudotranslation is [0 1 1]/2 - [0 0 1] = [0 1 -1]/2. Two conformations that differ by a ca 180° rotation of a -C(=O)OEt substituent. Approximate symmetry less exact than in most examples listed. Transformation (1 0 0 | 0 0.5 -0.5 | 0 0.5 0.5) gives cell with angles 102.5, 101.0, and 86.9°.	UWALIP
S	VASLOS	2011	296	0.04	2	-5.2 -10.9 -0.8	0.029				2	0	b, a; (0 0 1)	0.8	0.3 < z < 1.2	p2(1)11 (#9)	c; 1	1	0.01	0.14	5.2			none	(no donor)		Very obvious 2(1) axes; layers well separated.	VASLOS
S	VEFBIT	2012	RT	0.0463	2	15.7 5.6 0.2	0.061				2	0	b, a; (0 0 1)	0.2	-0.2 < z < 1.1	p2(1)11 (#9)	c; 1	1	0.00	0.28	15.7			none	NH…O=	1-D; a	Straightforward example of a layered structure. The H bonds connect molecules related by translation.	VEFBIT
S	VEHDEU	2017	100	0.0493	4	4.8 7.8 0.1	0.04, 0.07, 1.53 (4x)	(NA); 0.03-0.09			3	0 (2x); 3 (4x)	b, a; (0 0 1)	0.1	-0.5 < z < 0.5	pb2(1)a (#33)	c; 1	1	0.00	0.14 0.24	4.8 7.8			85% P-1, Z'=2	OH…O=, OH…O-	2-D; a,b	Kryptoracemate; #1&4 are homochiral as are #2&3. There are 2-D H-bonded bilayers that have quite high symmetry.	VEHDEU
S	VINCUR	2007	296	0.0347	2	13.8 11.1 0.8	0.032		0.023		5	0	b, a; (0 0 1)	0.8	-0.1 < z < 0.7	p2(1)11 (#9)	c; 1	1	0.01	0.25	13.8			none	(no donor)		Straightforward layered structure.	VINCUR
S	VOCJUU	2014	130	0.0301	2	14.7 0.4 3.3	0.124				4	0	c, a; (0 1 0)	0.4	-0.2 < y < 0.9	p2(1)11 (#9)	b; 1	1	0.00	0.25	14.7			[84% P-1 if incr tol but EP]	OH…N=	1-D; c	Some quite limited interpenetration of layers but the layers are obvious and contain the H-bonded chains.	VOCJUU
S	VUPVAF	2015	89	0.0429	4	-1.9 -8.9 -1.3	0.02, 0.10, 0.39 (4x)				1	0	a, b; (0 0 1)	1.3	0.0 < z < 1.1	p2(1)11 (#9), z'=2	c; 1	1	0.03	0.29	9.9			87% P-1 but EP	NH…N	2-D; a, b	4-Bromo-5,6,7,8-tetrahydroisoquinolin-8-amine. Two different conformations of the saturated C6 ring (#1&4 the same as are #2&3). Some NH…N contacts up to sumVDW + 0.3 Å. Approximate 2(1) along a relates #1&4 as well as #2&3. No other approximate symmetry.	VUPVAF
S	WASGOO	2011	100	0.046	2	-0.3 -13.8 -21.8	0.326		0.131		5	0	[1 -1 0], [1 1 0] (0 0 1)	3	0.4 < z < 1.4	c211 (#10)	c; 1	1	0.08	0.24	11.7			[92% if incr tol but EP]	(no donor)		The angle in the layer differs from 90° by 3.0° but the 2 and 2(1) axes are obvious as is the centering.	WASGOO
S	WOYSEI	2002	293	0.036	2	-10.7 -13.1 -11.6	0.903		0.106		5	0	[2 0 -1], b; (1 0 2)	1	(not calc)	p2(1)11 (#9)	a; 1	1	0.01	0.26	39.6			none	(no donor)		A steroid. The conformational difference is a ca 180° rotation of a 2-pyridyl substituent.	WOYSEI
S	WUQJOJ	2013	156	0.046	2	-9.8 -0.9 -5.1	0.194		0.178		6	0	a, c; (0 1 0)	0.9	-0.3 < y < 0.7	p2(1)11 (#9)	b; 1	1	0.02	0.11	5.1			[83% P-1 with incr tol but EP]	OH…O=	1-D; a	(An intrmolecular NH…O= bond.) Layers less offset than usual but they are visually obvious. They include H-bonded chains, and the spacing for 2(1) axes in adjacent layers is clearly uneven.	WUQJOJ
S	XEFNAX	2000	RT	0.0413	2	10.7 5.3 14.6	1.704	0.029	1.662		3	3	a, b; (0 0 1)	(not special)	-0.5 < z < 0.4	p11a (#5)	c; 1	1	(NA)	0.15 0.20	5.3 10.7	13.6		[89% P-1 with incr tol]	(no donor)		Kryptoracemate. Straightforward layered structure.	XEFNAX
S	XEGKIG	2017	RT	0.0433	2 (like a 2:1 salt)	-17.3 -7.8 -15.3	0.02-0.17; 0.08		0.02-0.04; 0.07		0; 1	(NA); 0	a, [1 -2 0]; (0 0 1)	2	0.0 < z < 1.0	c211 (#10)	c; 1	1	0.12	0.27	7.8		[1 0 0]/2; 1.12 but for acid only	[90% P-1 with incr tol but EP]	OH…O(=/-) N(+)H...O= N(+)H…O	1-D; a	L-Proline bis(2,4-dichlorobenzoic acid) hemihydrate, Layers (0 0 1) contain H-bonded chains along a and have quite good layer symmetry c211. The 2(1) axes relate pairs of acid molecules that are also related by the pseudotranslation, which does not relate the proline or water molecules.	XEGKIG
S	XEVCEJ	2018	130	0.0287	4	-25.9 -2.5 -18.1	0.12-0.24				4	0	[1 -1 1]/2, [3 1 -1]/2; (0 1 1)	2.5	(not calc)	c211 (#10)	[0 1 1]; 2	1	0.10	0.57	11.1		[1 -1 1]/2; 0.97	[80% P-1 with incr tol but EP]	OH…O(-) OH…O (all with solvnts)	0-D (4-mer)	Layers (0 1 1) have quite good approximate symmetry c211 with axes [1 -1 1]/2 and [3 1 -1]/2. The third axis could be b or c but there is no approximate symmetry in the third dimension.	XEVCEJ
S	XIBBOB	2013	100	0.0454	2	-4.9 -0.4 -18.1	0.175		0.104		1	0	a, c; (0 1 0)	0.4	0.2 < y < 1.1	p2(1)11 (#9)	b; 1	1	0.01	0.34	18.1			none	NH…O=	1-D; a	Good example of a P1 structure composed of pseudosymmetric layers.	XIBBOB
S	XIBROS	2018	100	0.0395	2	-7.7 -2.0 -0.4	0.078		0.027		3	0	b, a (0 0 1)	0.4	-0.3 < z < 0.5	p2(1)11 (#9)	c; 1	1	0.00	0.2	7.7			none	OH…O	1-D; b	Straighforward layered structure. The layers are exceptionally well separated.	XIBROS
S	XOZDUM	2009	100	0.0456	2	4.5 6.2 1.2	0.09		0.06		5	0	b, a; (0 0 1)	1.2	-0.5 < z < 0.5	p2(1)11 (#9)	c; 1	1	0.02	0.24	4.5			[83% P-1 with incr tol but EP]	(no donor)		Straightforward layered structure.	XOZDUM
S	XUPLEB	2015	173	0.0262	4	-2.9 -1.0 -8.3	0.18-0.37		0.03-0.20		2	0	a, c; (0 1 0)	1	-0.3 < y < 0.8	c211 (#10)	b; 1	1	0.03	0.21	8.3		[1 0 -1]/2; 0.78 (& 0.84. 0.80)	[96% P-1 with incr tol but EP	OH…O=	0-D	Na+ salt of a borate anion plus included EtOH, which forms H bonds to the cation. One EtOH molecule is disordered. The pseudotranslation is the approximate centering vector of the c211 cell.	XUPLEB
S	YIZREG	2014	294	0.0439	2	21.9 1.5 18.2	0.107		0.058		2	0	c, a; (0 1 0)	1.5	-0.1 < y < 1.0	p2(1)11 (#9)	b; 1	1	0.02	0.35	21.9			[94% P-1 with incr tol but EP]	none		Molecule has an approximate axis 2, but it is not directed in any special crystallographic direction and the directions for the two molecules differ. Layers (1 -1 0) are more obvious but they have no overall approximate 2-D symmetry.	YIZREG
S	YOGVAR	1995	RT	0.0491	2	17.4 -5.0 7.9	1.803	0.089	1.694		1	1	c, b; (1 0 0)	(not special)	0.3 < x < 1.3	p11a (#5)	a; 1	1	(NA)	0.11 0.18	5.0 17.4	8.4		[89% P-1 with incr tol]	(no donor)		Kryptoracemate. The glide direction is c of the 3-D structure. Which is axis 2 (ie, b) of the approximate layer group.	YOGVAR
S	YOHYUQ	2008	RT	0.0494	2	10.9 13.6 0.2	0.06				2	0	a, b; (0 0 1)	0.2	-0.3 < z < 0.6	p2(1)11 (#9)	c; 1	1	0.00	0.27	13.6			87% P-1 if incr tol but EP	OH…O=	1-D; a	Straightforward example of a layered structure.	YOHYUQ
S	YONVOM	1995	295	0.0458	4	11.8 -0.2 24.5	0.16-1.20	0.57-0.78 (4 of the 6 pairs)	0.16-0.46		2	0	b, [1 1 -1]/2 (1 0 1)	(not special)	(not calc)	p112 (#3)	[1 1 1]; 2	1	(NA)	0.40 0.17		25	[1 1 1]/2; 1.20	[96% P-1 if incr tol but EP]	OH…O	0-D (2-mers)	Diol; conformations of the four Cy groups vary. The dimers have approx 222 sym except for the Cy conformations. Layers (1 0 1) including the pseudotrans [1 1 1]/2 - [0 0 1] = [1 1 -1]/2 are not especially well separated but seem the best description.	YONVOM
S	YOYFAT	1995	RT	0.041	2	-0.0 11.8 0.2	0.153		0.07		5	0	a, b; (0 0 1)	0.2	0.3 < z < 1.2	p2(1)11 (#9)	c; 1	1	0.00	0.24	11.8			none	OH…O= OH…O	1-D; a	Straightforward example of a layered structure with approximate 2(1) axes in the layers.	YOYFAT
S	ZEXFUF	2013	293	0.0483	2	8.2 10.2 1.0	0.05				4	0	b, a; (0 0 1)	1	0.1 < z < 1.1	p2(1)11 (#9)	c; 1	1	0.02	0.22	8.2			none	(no donor)		Straightforward layered structure.	ZEXFUF
S	ZICZEQ	1995	295	0.032	2	19.3 17.3 -26.0	0.16		0.045		3	0	a, [1 -2 0]; (0 0 1)	1.5	-0.5 < z < 0.6	c211 (#10)	c; 1	1	0.05	0.29	17.3			[94% P-1 with incr tol but EP]	OH…O=	1-D; a	The layers are a little less well separated than usual but the 2(1) and 2 axes are obvious. Layers (0 1 0) are also separated, but they have approximate 1-D symmetry only [ie, H-bonded chains described by rod group p112(1)].	ZICZEQ
S	ZIVZAI	2019	293	0.043	2	4.9 3.7 0.3	0.016				5	0	b, a; (0 0 1)	0.3	-0.5 < z < 0.5	p2(1)11 (#9)	c; 1	1	0.01	0.26	4.9			[84% P-1 if incr tol but EP]	(no donor)		Obvious layers have good approximate 2(1) axes.	ZIVZAI
S	ZIYNAW	1995	295	0.045	2	-15.0 -15.8 -28.8	0.167		0.041		1	0	[0 1 -1], [2 -1 -1]; (1 1 1)	1.4	(not calc)	c211 (#10)	c; 1	1	0.04	0.24	22.1			[87% P-1 with incr tol but EP]	OH…O= NH…O=	2-D; in (1 1 1)	N-Trichloroacetyl-L-alanine. Note that the Mercury defaults mark OH…Cl bonds; they connect layers but are not conventional H bonds.	ZIYNAW
S	ZODWOE	1995	RT	0.0313	2	0.3 6.3 -20.0	0.094		0.045		0	(NA)	b, c; (1 0 0)	0.3	0.0 < x < 1.0	p2(1)11 (#9)	a; 1	1	0.00	0.26	20			none	(no donor)		Straightforward example of a layered structure with approximate 2(1) axes in the layers.	ZODWOE
S	ZULNAV	1995	RT	0.0387	4	0.3 19.4 8.2	0.06-0.18		0.03-0.09		8	0	c, b; (1 0 0)	0.3	0 < x < 1.0	p2(1)11 (#9), z'=2	a; 1	1	0.00	0.24	19.4			none	OH…O	0-D (2-mers)	H-bonded pairs #1&4 and #2&3; OH groups Iin #3 and #4) do not form H bonds. The approx 2(1) axes relate #1&3 as well as #2&4. The asymmetric unit of the approximate p12(1)1 layer cell contains a pair of H-bonded molecules unrelated by any approx sym.	ZULNAV
S	ZUTMAC	1996	RT	0.05	2	0.3 15.2 20.5	0.088		0.077		1	0	c, b; (1 0 0)	0.3	0.3 < x < 1.2	p2(1)11 (#9)	a; 1	1	0.01	0.26	15.2			88% P-1 but EP	OH…O=	1-D; [0 1 1]; [0 1 -1]	The H-bonded chains are along [0 1 1] in the half layer at x=0.48 (molecule #1) and along [0 1 -1] in the half layer at x=1.00 (molecule #2). A pair of such half layers makes up the structural layer that has approximate symmetry p12(1)1.	ZUTMAC
SR	ACEZOX	2001	180	0.0435	4	-1.6 -1.4 0.0	0.02-0.07				0	(NA)	a, b; (0 0 1)	0	0.4 < z < 0.9; 0.9 < z < 1.4	p2(1)11; p12(1)1 (#9)	c; 1 pair	2	0.00,; 0.00	0.07; 0.08	1.4; 1.6			none	(no donor)		P(OCy)5. There is a nearly 90° rotation between the two independent layers (#3&4, #1&2) so that a and b are very similar (10.085 and 10.089 Å) but there is no tetragonal space group with 2(1) axes separated by c/2 and going in different directions.	ACEZOX
SR	ECEHAY	2017	RT	0.0365	4	6.6 6.4 0.0	0.04-0.09				2	0	a, b; (0 0 1)	0	0.0 < z < 0.5; 0.5 < z < 1.0	p2(1)11; p12(1)1 (#9)	c; 1 pair	2	0.00	0.031; 0.32	6.4; 6.6			[85% P-1 if incr tol but EP]	OH…O=	1-D; b	Two independent layers with two independent molecules each have H-bonded chains that are along a (#1&2) or along b (#3&4), There is a 90.0° rotation between the two independent layers; a=7.99, b=8.05 Å.	ECEHAY
A	HUZDOV	2003	180	0.043	4 (like a 1:2 salt)	-3.8 -5.2 -0.1	0.08-0.16; 0.01-0.07				0; 0	(NA); (NA)	a, b (0 0 1)	0.1	0.1 < z < 0.4; 0.4 < z < 0.6	p-4 (#50); p-1 (#2)	c; 2 pairs	4	0.10; (NA)	0.07 0.10; (NA)		6.4	[1 -1 0]/2; 0.37 (better for cations)	[88% P-1, Z'=2 if incr tol but disordrd]	(NA); OH…O	(NA); 0-D (4-mers)	[(n-Bu)4N+](2,6-dihydroxybenzoate).2,6-dihydroxybenzoic acid; pseudotrans for the four cations only. Layers (0 0 1) alternate: approx sym p-4 for cations (a=13.98, b=14.05 Å) and p-1 (#2) for anions and included acid molecules. The 1-bar sites for the two anion layers are not in the same place. The 4-mer has 2 bifurcated H bonds.	HUZDOV
A	IFAFUS	2013	110	0.0423	3	-9.2 -2.3 -0.4	0.13, 0.12; 0.22		0.04, 0.06; 0.08		5	0	b, a; (0 0 1)	0.4	0.1 z < 0.7; 0.7 < z < 1.0	p2(1)11 (#9); p1 (#1)	c; 1 pair	2	0.01	0.23	9.2			[82% P-1, if incr tol but EP]	(no donor)		Two layer types that alternate. Molecules #1,3 are in a layer with approximate p12(1)1 symmetry; #2 is in a layer by itself that has only translational symmetry. Layers (1 0 1) with all molecules are the most obvious but they have no approximate symmetry.	IFAFUS
A	TOJRAM	2008	100	0.045	2	-12.4 -13.3 -27.3	0.08; 0.91	(NA); 0.13	0.02; (NA)		0; 0	(NA); (NA)	a, b (0 0 1); b, [2 -1 0], (0 0 1)	(not special); 2.7	0.0 < z < 0.3; 0.3 < z < 1.0	p1 (#1); c211 (#10)	c; 1	2	(NA); 0.03	(NA); (0.13)	12.4			[86% P-1 with incr tol}	OH…O=	0-D; (2-mer)	The N([S(=O)2CF3]N- anion has approximate symmetry 2 so is conformationally chiral. The layer of the two cations and one anion has approx sym c211. The layer of the other anion has only translational sym; that layer has approx 2s along [0 1 -1], which is not a special direction.	TOJRAM
A	WAZSAT	2012	123	0.0378	4	9.0 0.2 15.7	0.04-0.07				(C2 sym)	0	a, b; (0 0 1)	(not special)	-0.2 < z < 0.3; 0.3 < z < 0.8	p112 (#3)	c; 1 pair	2	(NA)	0.01; 0.22		9.4		none	(no donor)		Layers (0 0 1) Rigid, V-shaped molecules have good local axes 2 approx along a for layer near z=0 (#3,4) and along b near z=1/2 (#1,2). Both have approx sym p112 but the arrangements of the molecules differ and the 2s are better for the layer near z=0.	WAZSAT
A	XURWEO	2011	173	0.0294	3	14.9 1.0 16.9	0.16-0.21		0.09-0.17		2	0	a, [1 2 0]; (0 0 1)	1.7	-0.4 < z < 0.3; 0.3 < z < 0.6	c211 (#10); p1 (#1)	c; 1 pair	2	0.09	0.04	1			89% C2 with incr tol	(no donor)		Layers (0 0 1) of molecules #1&2 have very good approximate c211 symmetry but layers of #3 have no approximate symmetry. The layers of #3 break any possible 3-D approximate symmetry. The orientation of #3 is unrelated to the orientations of #1&2.	XURWEO
136	136	136	136	136	136	136	136	23	82	8	136	136	136	136	136	136	136	136	136	136	128	17	14	136	136	61	136	136
